# Supplementary material for: Switching on oxygen activation by cobalt complexes of pentadentate ligands
Source: Royal Society of Chemistry journal article supplement (doi:10.1039/c1dt10594a), 2011-01-01
Supplement: c1dt10594a.pdf [file c1dt10594a.pdf]

Supplementary Material

**Switching on Oxygen Activation by Cobalt Complexes of Pentadentate Ligands**

Mads S. Vad,<sup>a</sup> Anne Nielsen,<sup>a</sup> Anders Lennartson,<sup>a</sup>

Andrew D. Bond<sup>a</sup> and John E. McGrady<sup>b</sup> Christine J. McKenzie<sup>a</sup> \*

<sup>a</sup>*Department of Physics and Chemistry, University of Southern Denmark,  
Campusvej 55, 5230 Odense M, Denmark.*

*Fax: (+45) 6615 8760; Tel: (+45) 6550 2518; E-mail: chk@ifk.sdu.dk*

<sup>b</sup>*Inorganic Chemistry Laboratory, Department of Chemistry,  
University of Oxford, South Parks Road, Oxford OX1 3QR, United Kingdom.*

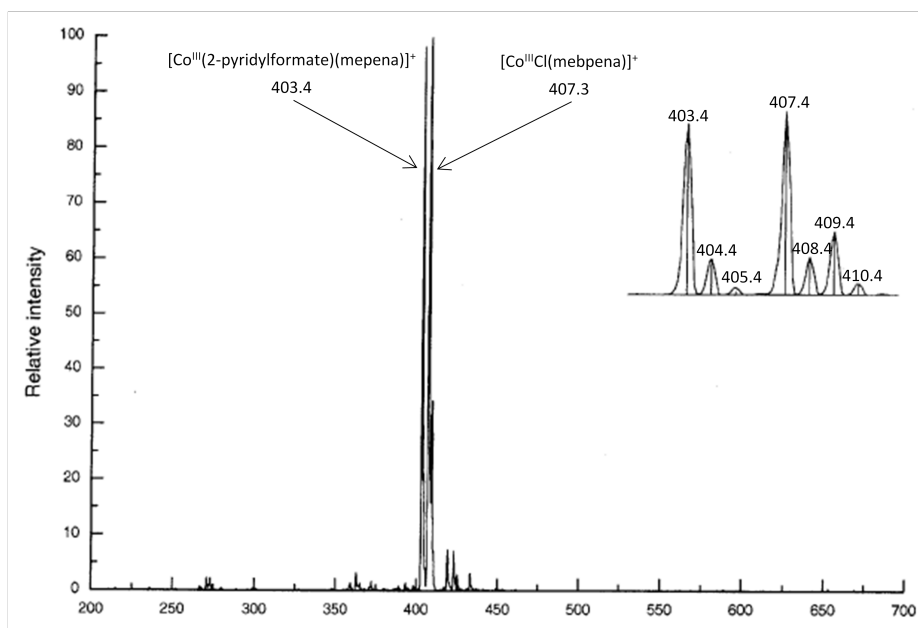

**Figure S1.** ESI mass spectrum of a solution of a red solid isolated from the reaction of mebpenaH and cobalt(II)perchlorate. Assignments:  $m/z$  403.3  $[\text{Co}(2\text{-pyridylformate})(\text{mepena})]^+$  (**4**), 407.3  $[\text{Co}(\text{mebpena})(\text{Cl})]^+$  (**1**).

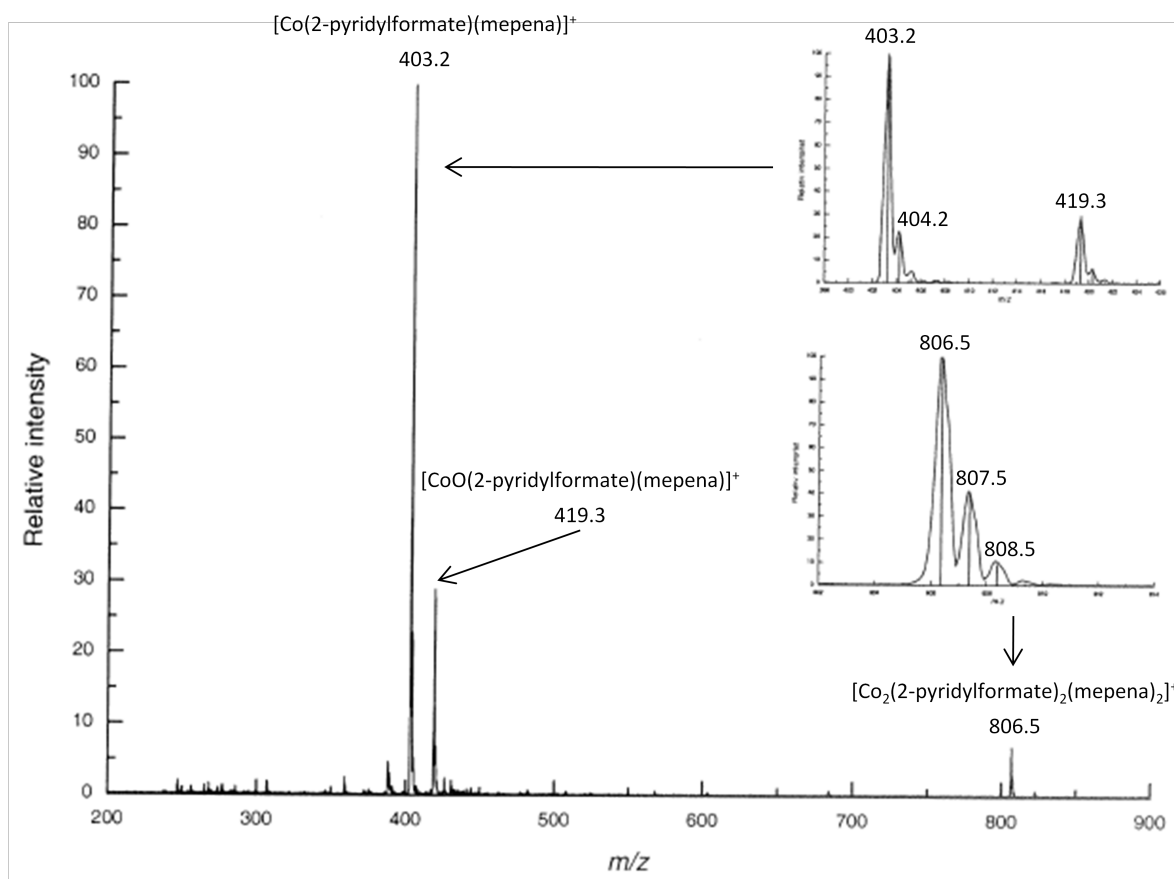

**Figure S2.** ESI mass spectrum of a crystal of the product of the reaction of  $[\text{Mn}_2(\text{mepena})_2(\text{H}_2\text{O})_2](\text{ClO}_4)_2$ , cobalt(II)perchlorate and dioxygen in MeOH. Assignments:  $m/z$  403.3  $[\text{Co}(\text{2-pyridylformate})(\text{mepena})]^+$  (**4**), 419.3  $[\text{CoO}(\text{2-pyridylformate})(\text{mepena})]^+$ , 806.5  $[\text{Co}_2(\text{2-pyridylformate})_2(\text{mepena})_2]^+$ .

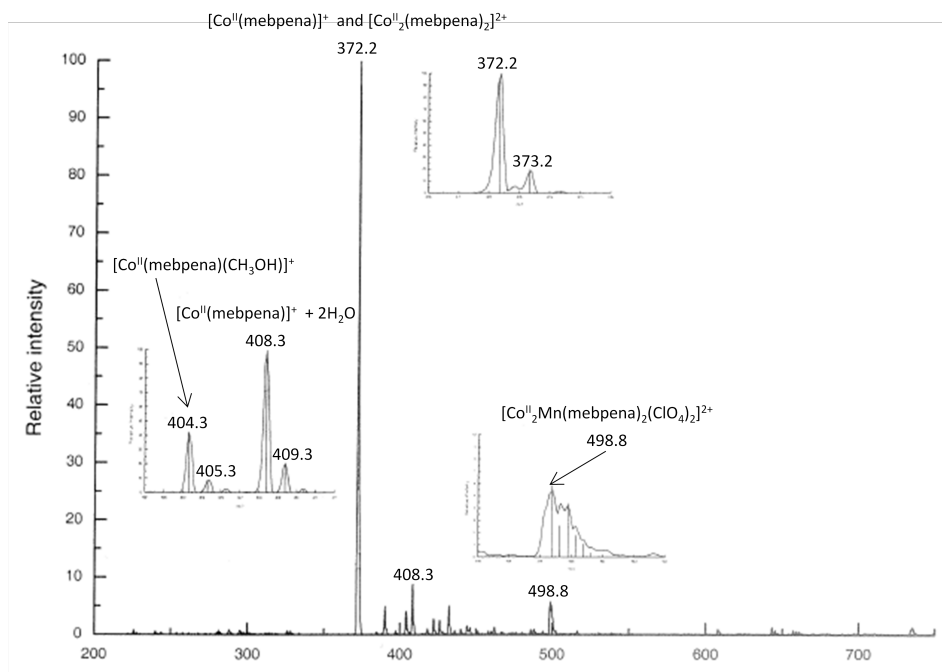

**Figure S3.** ESI mass spectrum of a sample of the reaction mixture of  $[\text{Mn}_2(\text{mebpena})_2(\text{H}_2\text{O})_2](\text{ClO}_4)_2$  and cobalt(II)perchlorate directly after it was mixed and purged with dioxygen for 10 minutes. Assignments:  $m/z$  372.2  $[\text{Co}(\text{mebpena})]^+$ , 404.3  $[\text{Co}^{\text{II}}(\text{mebpena})(\text{CH}_3\text{OH})]^+$ , 408.3  $[\text{Co}^{\text{II}}(\text{mebpena})]^+ + 2\text{H}_2\text{O}$ , 498.2  $[\text{Co}_2\text{Mn}(\text{mebpena})_2(\text{ClO}_4)_2]^{2+}$ .

### Observation of reactivity using benzylated ligand (Scheme 1(a) R= benzyl)

The reactions of Co(II) salts with the benzylated ligand *N*-benzyl-*N,N'*-bis(2-pyridylmethyl)ethylenediamine-*N'*-acetate (bzbpna<sup>-</sup>) (Scheme 1(a) R= benzyl) were also investigated. The chloride complex analogous to **1** of the intact ligand can be made and so can the Mn(II) starting material [Mn(bzbpna)]<sub>n</sub>(ClO<sub>4</sub>)<sub>n</sub>·*n*CH<sub>3</sub>OH (R. K. Egdal et al., *Dalton Transactions*, **2011**, 40, 3849 – 3858). However the reaction of bzbpnaH or [Mn(bzbpna)]<sub>n</sub>(ClO<sub>4</sub>)<sub>n</sub>·*n*CH<sub>3</sub>OH with cobalt perchlorate appears to give more products of more oxidised ligand derivatives compared the mebpena<sup>-</sup>-derived system due to the involvement of the dangling benzyl group (although the reaction actually appears to be quite “clean”). Thus ESI mass spectra of reaction solution showed dominant ions consistent with the formation of several Co complexes of ligands derived, not only from an analogous C–N cleavage but also a second reaction, namely intramolecular oxygenation of the dangling benzyl group. Cations were observed corresponding to the formulation of Co complexes of all the ligands depicted in Scheme S1 (2-pyridylformate, *N*-benzyl-*N'*-2-pyridylmethylethylenediamine-*N'*-acetate, *N*-hydroxybenzyl-*N,N'*-bis(2-pyridylmethyl)ethylenediamine-*N'*-acetate (bzObpena<sup>2-</sup>) and *N*-hydroxybenzyl-*N'*-2-pyridylmethylethylenediamine-*N'*-acetate). Mass spectra and details of the assignments are shown in Figure S4. As described in the Introduction, we have previously observed aromatic oxygenation in the reaction of the Fe(II) complex of bzbpna<sup>-</sup> to give [Fe<sup>III</sup>(bzObpena)]<sup>+</sup> depicted in Scheme 2(c). In this case we were able to isolate [Fe<sup>III</sup>(bzObpena)]<sup>+</sup> in yields greater than 50% suggesting that the Fe-dependent reaction is more specific than the Co-dependent reaction. On the basis of the current results it cannot be determined whether or not either of these ligand oxidations is favoured, or in the cases where both modifications occur whether the reactions are consecutive or concerted. Clearly, the mixture of products (for which several isomers may be possible!) has hampered the isolation of any of them from being obtained in a pure form.

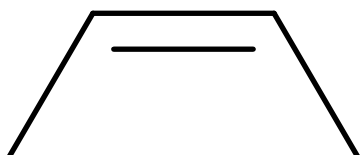

**Scheme S1.** C-N cleavage of bzbpna<sup>-</sup> to give 2-pyridylformate (pfa<sup>-</sup>), *N*-benzyl-*N'*-(2-pyridylmethyl)ethylenediamine-*N'*-acetate (bzpena<sup>-</sup>), *N*-phenolato-*N,N'*-bis-2-pyridylmethyl-ethylenediamine-*N'*-acetate (bzObpena<sup>2-</sup>) and *N*-phenolato-*N'*-2-pyridylmethylethylenediamine-*N'*-acetate (bzOpena<sup>2-</sup>).

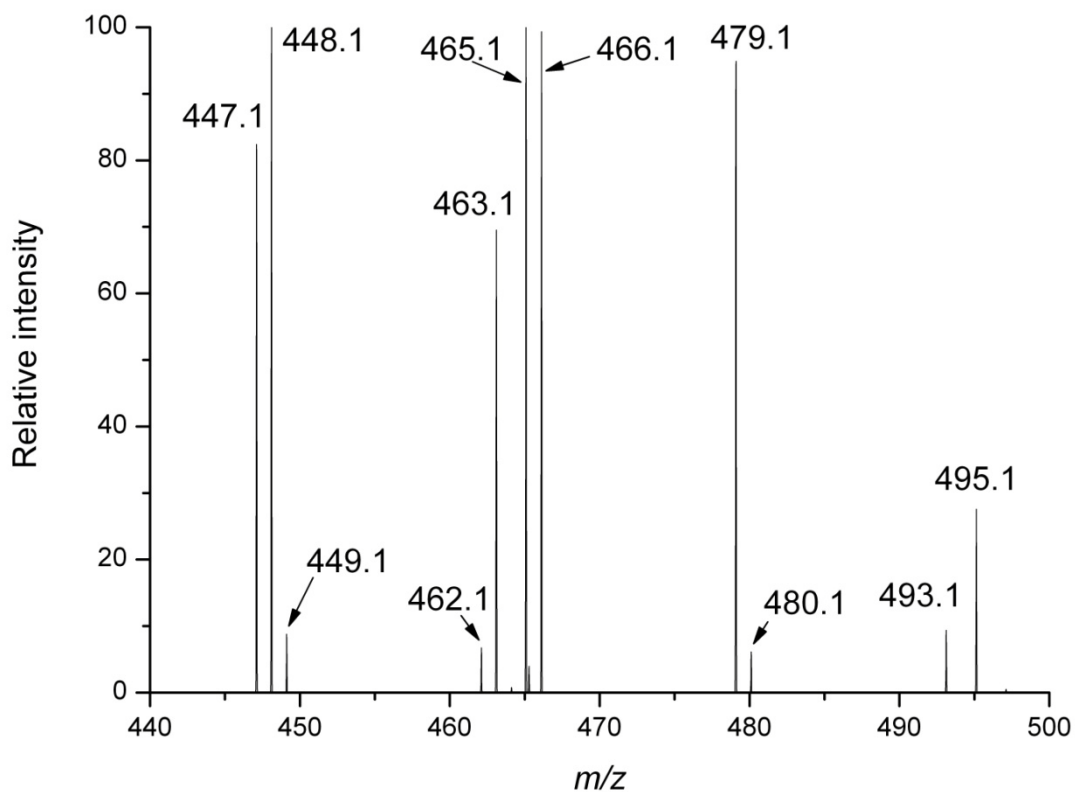

**Figure S4.** *In situ* oxidation of  $[\text{Co}(\text{bzbpena})]^+$ : ESI mass spectrum (in methanol/water) of the reaction between  $[\text{Mn}(\text{bzbpena})]^+$  and  $\text{Co}^{2+}$ . A suspension of  $[\text{Mn}(\text{bzbpena})]_n(\text{ClO}_4)_n \cdot n\text{CH}_3\text{OH}$  (255 mg, 0.45 mmol) of  $\text{Co}(\text{ClO}_4)_2 \cdot 6\text{H}_2\text{O}$  (165 mg, 0.45 mmol) in methanol (20 ml) and water (35 ml) was stirred vigorously for 4 hours, purged with oxygen for 10 minutes and filtered. Overnight a small amount of a fine brown powder, ( $\text{MnO}_2$ ) was deposited. The ESI mass spectrum of the supernatant is shown. Possible assignments are depicted on next page.

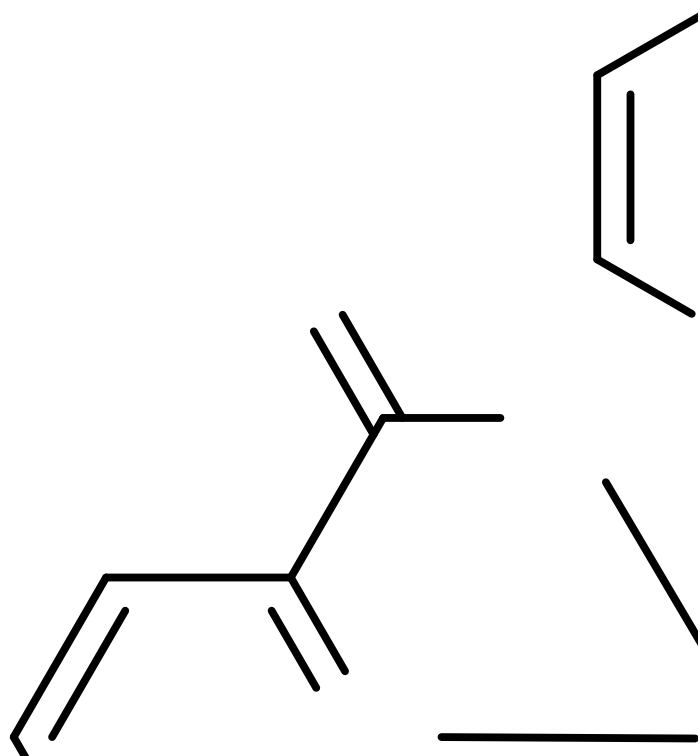

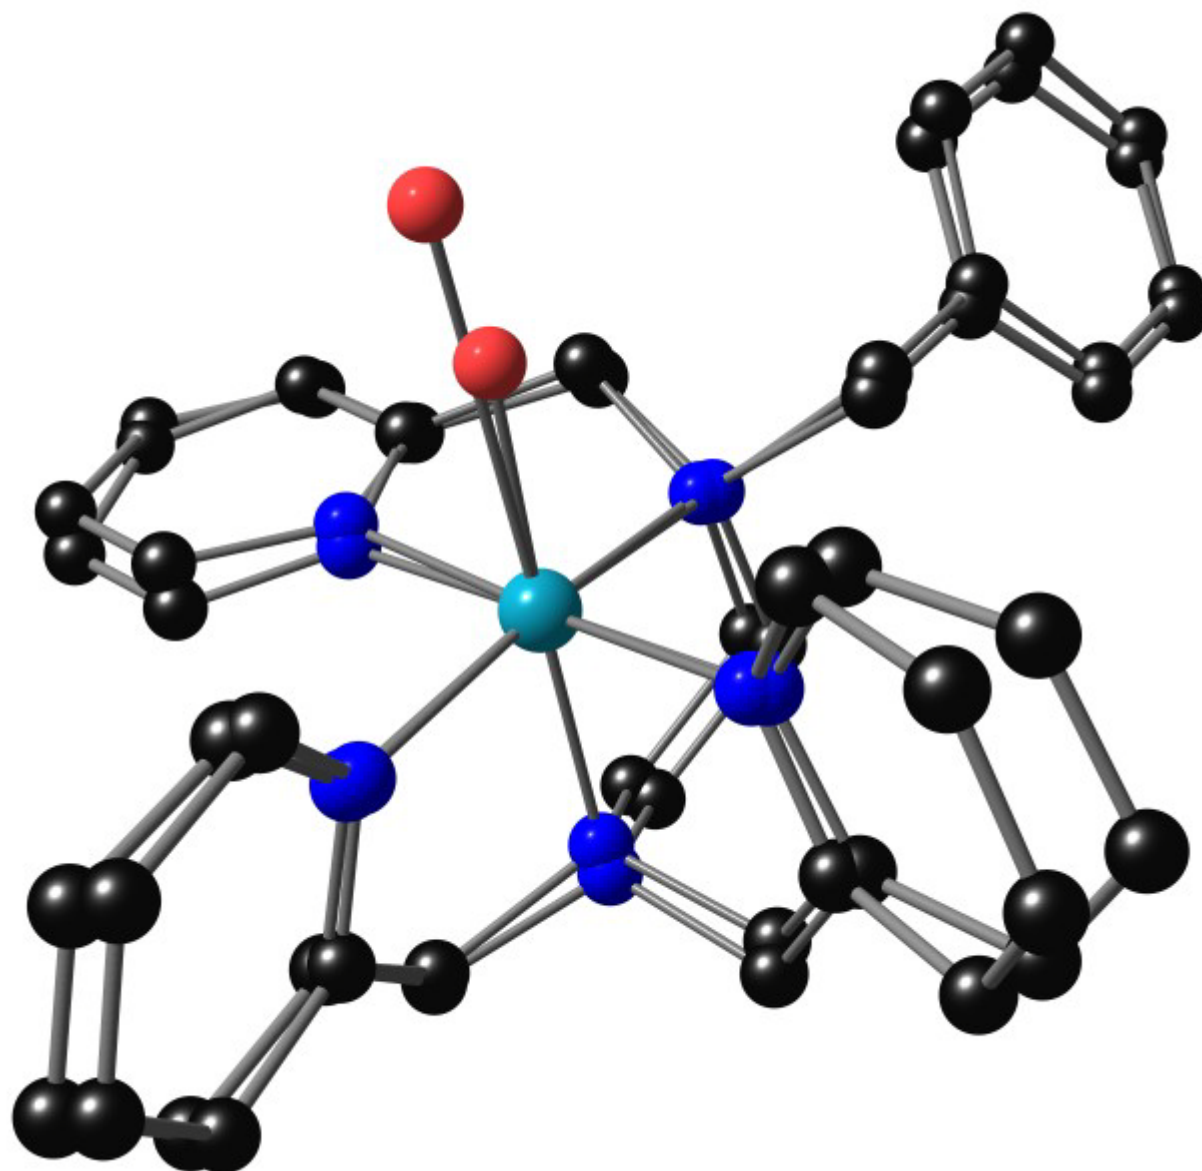

**Figure S5.** An overlay of the geometry of a minimum for  $[\text{Co}^{\text{II}}(\text{bztpen})(\text{H}_2\text{O})]^{2+}$  optimised in a quartet electronic state and the crystal structure of the cation in **3**. The geometry is optimised at BLYP/TZVP level of theory with the SDD Stuttgart/Dresden effective core potential basis set on Co. The hydrogen atoms have been omitted for clarity.

**Table S1** The Cartesian coordinates of **3** as acquired from the crystal structure.

|   |           |           |           |
|---|-----------|-----------|-----------|
| C | 2.398002  | 9.046745  | 10.905630 |
| H | 3.188289  | 9.260382  | 10.423743 |
| C | 1.479639  | 10.038563 | 11.162770 |
| H | 1.623263  | 10.921650 | 10.844377 |
| C | 0.341815  | 9.732059  | 11.891664 |
| H | -0.297922 | 10.405376 | 12.089393 |
| C | 0.148307  | 8.434033  | 12.328417 |
| H | -0.626830 | 8.205405  | 12.829340 |
| C | 1.091657  | 7.475515  | 12.028907 |



|    |          |          |           |
|----|----------|----------|-----------|
| C  | 0.990878 | 6.024244 | 12.402105 |
| H  | 0.475503 | 5.923361 | 13.240764 |
| H  | 0.526192 | 5.521321 | 11.687181 |
| C  | 5.142881 | 8.339112 | 12.541498 |
| H  | 5.522658 | 8.510561 | 11.687181 |
| C  | 5.441003 | 9.176595 | 13.593851 |
| H  | 6.011979 | 9.925121 | 13.466432 |
| C  | 4.899249 | 8.916685 | 14.838559 |
| H  | 5.097001 | 9.482537 | 15.575743 |
| C  | 4.064563 | 7.822914 | 15.003435 |
| H  | 3.690877 | 7.623739 | 15.853608 |
| C  | 3.787205 | 7.028185 | 13.909173 |
| C  | 2.890265 | 5.824288 | 13.960140 |
| H  | 2.127162 | 6.005028 | 14.564072 |
| H  | 3.392906 | 5.051480 | 14.321517 |
| C  | 1.447742 | 5.862407 | 9.136664  |
| H  | 0.972550 | 6.608613 | 9.484225  |
| C  | 0.927018 | 5.180503 | 8.060670  |
| H  | 0.101621 | 5.448558 | 7.674270  |
| C  | 1.621400 | 4.098175 | 7.548540  |
| H  | 1.269800 | 3.605181 | 6.816115  |
| C  | 2.833675 | 3.740570 | 8.114247  |
| H  | 3.333197 | 3.012395 | 7.764844  |
| C  | 3.304908 | 4.461683 | 9.195154  |
| C  | 4.633426 | 4.216346 | 9.830250  |
| H  | 5.337936 | 4.693751 | 9.324568  |
| H  | 4.840454 | 3.248682 | 9.809679  |
| C  | 3.937546 | 3.689891 | 12.153409 |
| H  | 4.384907 | 3.689224 | 13.036587 |
| H  | 4.025441 | 2.784115 | 11.763939 |
| C  | 2.470719 | 4.025154 | 12.329799 |
| H  | 1.964329 | 3.785694 | 11.513707 |
| H  | 2.093488 | 3.520302 | 13.093388 |
| C  | 6.033989 | 4.928154 | 11.716656 |
| H  | 6.434669 | 5.646024 | 11.165226 |
| H  | 6.006530 | 5.249874 | 12.652797 |
| C  | 6.933718 | 3.716413 | 11.652947 |
| C  | 7.151463 | 2.924561 | 12.784207 |
| H  | 6.686560 | 3.115883 | 13.590780 |
| C  | 8.041264 | 1.863966 | 12.738612 |
| H  | 8.187443 | 1.337543 | 13.515557 |
| C  | 8.719584 | 1.564532 | 11.567438 |
| H  | 9.325368 | 0.833140 | 11.539805 |
| C  | 8.507719 | 2.337958 | 10.438634 |
| H  | 8.965016 | 2.133486 | 9.631600  |
| C  | 7.631538 | 3.409013 | 10.482540 |
| H  | 7.502666 | 3.942250 | 9.706823  |
| Co | 3.495444 | 6.352156 | 11.217560 |
| N  | 2.204387 | 7.784525 | 11.319970 |
| N  | 4.322908 | 7.280771 | 12.699159 |

|   |          |          |           |
|---|----------|----------|-----------|
| N | 4.613564 | 4.696943 | 11.245668 |
| N | 2.616075 | 5.500287 | 9.714806  |
| N | 2.378375 | 5.494994 | 12.584329 |
| O | 4.627871 | 7.216058 | 10.005258 |
| H | 4.278815 | 7.215056 | 9.240134  |

**Table S2** The Cartesian coordinates for the structure of  $[\text{Co}^{\text{II}}(\text{bztpen})(\text{H}_2\text{O})]^{2+}$  optimised at BLYP/TZVP level of theory with the SDD Stuttgart/Dresden effective core potential basis set on Co.  $G = -1541.353885 E_h$ ,  $\langle S^2 \rangle = 3.76$ .

|   |           |           |           |
|---|-----------|-----------|-----------|
| C | 1.818302  | 9.291467  | 10.806278 |
| H | 2.698317  | 9.617176  | 10.254006 |
| C | 0.752409  | 10.160652 | 11.046644 |
| H | 0.793204  | 11.184606 | 10.681138 |
| C | -0.351869 | 9.687416  | 11.764274 |
| H | -1.198571 | 10.339260 | 11.973122 |
| C | -0.349644 | 8.362238  | 12.217266 |
| H | -1.192302 | 7.966886  | 12.782431 |
| C | 0.750815  | 7.546016  | 11.935696 |
| C | 0.812607  | 6.082118  | 12.341979 |
| H | 0.111212  | 5.874047  | 13.164293 |
| H | 0.503692  | 5.461904  | 11.490039 |
| C | 5.566633  | 8.177591  | 12.895150 |
| H | 6.000559  | 8.419898  | 11.927666 |
| C | 6.153078  | 8.641871  | 14.068957 |
| H | 7.045439  | 9.262387  | 14.023943 |
| C | 5.572709  | 8.284148  | 15.293032 |
| H | 6.005493  | 8.621932  | 16.233234 |
| C | 4.427426  | 7.485007  | 15.287260 |
| H | 3.952895  | 7.191704  | 16.222918 |
| C | 3.884235  | 7.062900  | 14.065282 |
| C | 2.596913  | 6.247013  | 14.047100 |
| H | 1.785746  | 6.899423  | 14.398158 |
| H | 2.667119  | 5.431449  | 14.781745 |
| C | 1.707379  | 6.116381  | 8.590568  |
| H | 1.421183  | 7.147386  | 8.784215  |
| C | 1.092285  | 5.378551  | 7.581838  |
| H | 0.322395  | 5.837497  | 6.965156  |
| C | 1.480142  | 4.045212  | 7.393589  |
| H | 1.011795  | 3.432635  | 6.624903  |
| C | 2.483064  | 3.515332  | 8.208527  |
| H | 2.813977  | 2.485357  | 8.082663  |
| C | 3.078167  | 4.323537  | 9.188833  |

|    |          |          |           |
|----|----------|----------|-----------|
| C  | 4.265636 | 3.812605 | 9.986427  |
| H  | 5.146576 | 3.896449 | 9.337141  |
| H  | 4.150972 | 2.738023 | 10.188503 |
| C  | 3.945049 | 3.909305 | 12.456087 |
| H  | 4.480029 | 4.281068 | 13.337386 |
| H  | 4.095087 | 2.820115 | 12.429902 |
| C  | 2.450612 | 4.215128 | 12.595618 |
| H  | 1.899409 | 3.851529 | 11.721183 |
| H  | 2.048184 | 3.686755 | 13.475134 |
| C  | 6.074154 | 4.745246 | 11.427810 |
| H  | 6.394195 | 5.396121 | 10.605125 |
| H  | 6.200651 | 5.301308 | 12.362417 |
| Co | 3.502093 | 6.597437 | 11.147977 |
| N  | 1.822754 | 8.006959 | 11.236559 |
| N  | 4.450364 | 7.401316 | 12.879564 |
| N  | 4.554741 | 4.570168 | 11.248642 |
| N  | 2.684561 | 5.607384 | 9.389605  |
| N  | 2.216657 | 5.695115 | 12.701127 |
| O  | 4.749290 | 7.710201 | 9.596098  |
| H  | 4.615228 | 7.458662 | 8.663710  |
| H  | 5.438271 | 8.400204 | 9.595607  |
| C  | 6.918774 | 3.480612 | 11.444947 |
| C  | 7.099268 | 2.739673 | 12.630674 |
| C  | 7.579010 | 3.048953 | 10.276931 |
| C  | 7.887802 | 1.583146 | 12.638995 |
| C  | 8.369675 | 1.893260 | 10.283468 |
| C  | 8.518467 | 1.153455 | 11.463469 |
| H  | 6.647538 | 3.077451 | 13.563927 |
| H  | 7.503383 | 3.634439 | 9.358909  |
| H  | 8.024174 | 1.026697 | 13.565111 |
| H  | 8.880411 | 1.580034 | 9.374162  |
| H  | 9.138562 | 0.258531 | 11.472518 |



**Figure S6.** An overlay of the geometry of a minimum for  $[\text{Co}^{\text{II}}(\text{bztpen})(\text{H}_2\text{O})]^{2+}$  optimised in a doublet electronic state and the crystal structure of the cation in **3**. The geometry is optimised at BLYP/TZVP level of theory with the SDD Stuttgart/Dresden effective core potential basis set on Co. The hydrogen atoms have been omitted for clarity.

**Table S3** The Cartesian coordinates for the structure of  $[\text{Co}^{\text{II}}(\text{bztpen})(\text{H}_2\text{O})]^{2+}$  optimised at BLYP/TZVP level of theory with the SDD Stuttgart/Dresden effective core potential basis set on Co.  $G = -1541.358727 E_h$ ,  $\langle S^2 \rangle = 0.76$ .

|   |           |           |           |
|---|-----------|-----------|-----------|
| C | 2.129585  | 9.081062  | 10.860420 |
| H | 3.056311  | 9.305748  | 10.335529 |
| C | 1.120215  | 10.031357 | 11.021436 |
| H | 1.252715  | 11.032380 | 10.616487 |
| C | -0.043241 | 9.673578  | 11.711999 |
| H | -0.844623 | 10.395427 | 11.860162 |

|   |           |          |           |
|---|-----------|----------|-----------|
| C | -0.159952 | 8.373201 | 12.218996 |
| H | -1.050336 | 8.068447 | 12.766848 |
| C | 0.878800  | 7.459711 | 12.018910 |
| C | 0.807783  | 6.008897 | 12.485443 |
| H | 0.105694  | 5.910210 | 13.327691 |
| H | 0.416365  | 5.387614 | 11.668495 |
| C | 5.289357  | 8.191038 | 12.696943 |
| H | 5.622838  | 8.393745 | 11.682499 |
| C | 5.860217  | 8.825786 | 13.796348 |
| H | 6.664256  | 9.543555 | 13.649086 |
| C | 5.379762  | 8.520901 | 15.077007 |
| H | 5.805432  | 8.997548 | 15.958332 |
| C | 4.337315  | 7.599960 | 15.204356 |
| H | 3.934573  | 7.349807 | 16.185110 |
| C | 3.801792  | 6.997492 | 14.058326 |
| C | 2.646542  | 6.006554 | 14.156750 |
| H | 1.813767  | 6.486582 | 14.689621 |
| H | 2.947242  | 5.154109 | 14.782661 |
| C | 1.545455  | 5.974050 | 8.921404  |
| H | 1.096266  | 6.912892 | 9.228355  |
| C | 1.029769  | 5.255796 | 7.845182  |
| H | 0.169813  | 5.644834 | 7.304156  |
| C | 1.626369  | 4.040219 | 7.488170  |
| H | 1.237091  | 3.449363 | 6.660946  |
| C | 2.738642  | 3.603685 | 8.213024  |
| H | 3.238554  | 2.670692 | 7.958203  |
| C | 3.223639  | 4.382366 | 9.269323  |
| C | 4.501378  | 4.048774 | 9.988848  |
| H | 5.329524  | 4.450447 | 9.390723  |
| H | 4.660472  | 2.964818 | 10.056550 |
| C | 3.940595  | 3.824134 | 12.425308 |
| H | 4.449139  | 4.062206 | 13.364872 |
| H | 4.132098  | 2.762352 | 12.221838 |
| C | 2.430202  | 4.060735 | 12.595803 |
| H | 1.876005  | 3.755580 | 11.702094 |
| H | 2.068620  | 3.440082 | 13.432911 |
| C | 6.076767  | 4.939298 | 11.686961 |
| H | 6.402805  | 5.708512 | 10.978407 |
| H | 6.087741  | 5.374930 | 12.689489 |
| C | 7.004457  | 3.737889 | 11.619475 |
| C | 7.169457  | 2.879339 | 12.725501 |
| H | 6.632040  | 3.070922 | 13.654832 |
| C | 8.051114  | 1.793752 | 12.664249 |

|    |          |          |           |
|----|----------|----------|-----------|
| H  | 8.173467 | 1.145312 | 13.530458 |
| C  | 8.792247 | 1.555240 | 11.498906 |
| H  | 9.485025 | 0.716472 | 11.454683 |
| C  | 8.658459 | 2.414634 | 10.400672 |
| H  | 9.253699 | 2.251131 | 9.503582  |
| C  | 7.774247 | 3.498208 | 10.463025 |
| H  | 7.708694 | 4.179378 | 9.613030  |
| Co | 3.397933 | 6.403947 | 11.273260 |
| N  | 2.011661 | 7.818269 | 11.342432 |
| N  | 4.284039 | 7.282959 | 12.820992 |
| N  | 4.583870 | 4.694703 | 11.350248 |
| N  | 2.624417 | 5.552053 | 9.640677  |
| N  | 2.172974 | 5.515006 | 12.824152 |
| O  | 5.058903 | 7.838251 | 9.216759  |
| H  | 4.665348 | 7.766612 | 8.327578  |
| H  | 5.914767 | 8.279301 | 9.057680  |

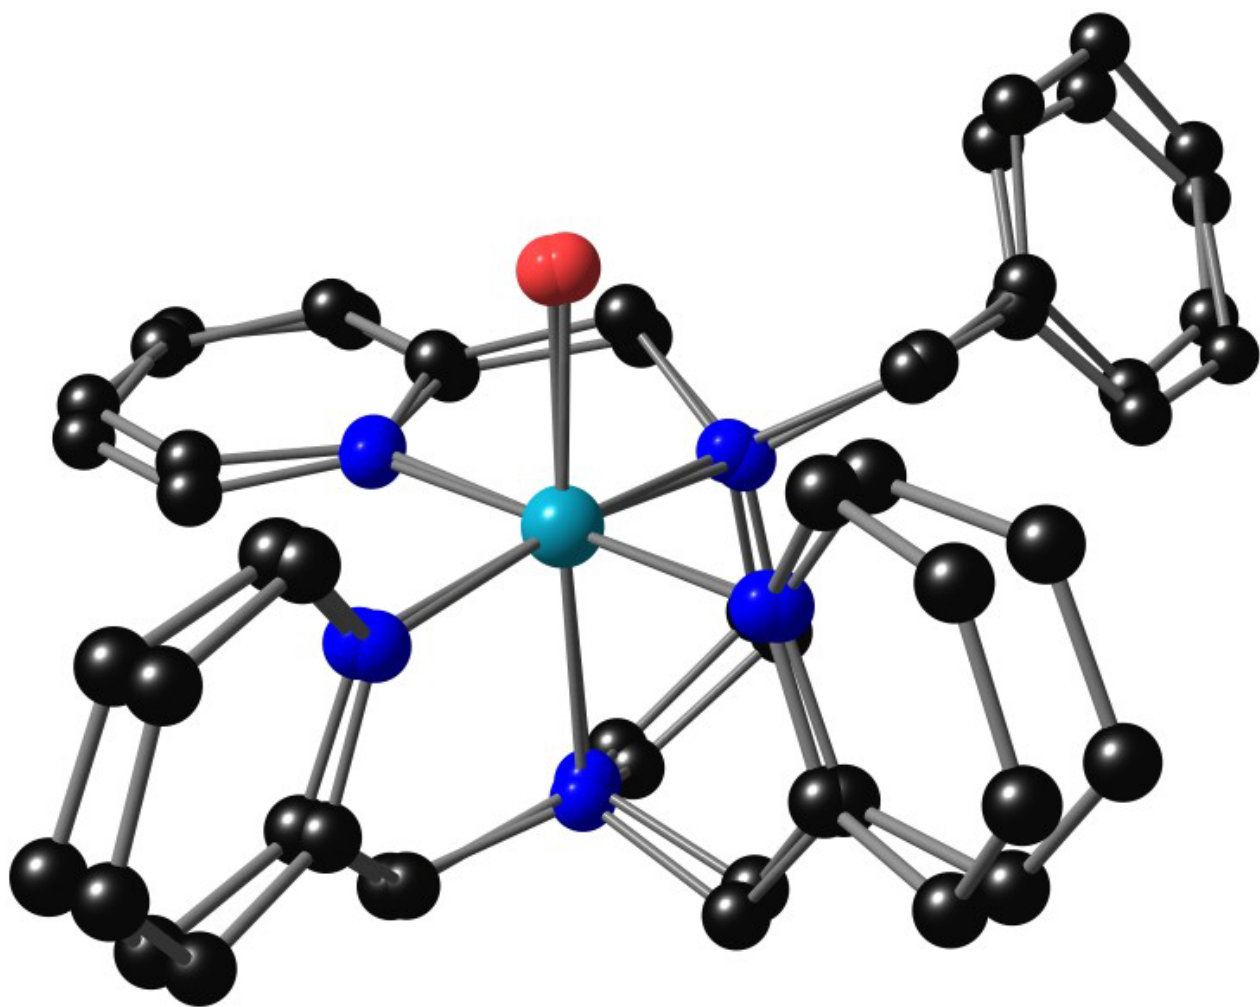

**Figure S7.** An overlay of the geometry of a minimum for  $[\text{Co}^{\text{III}}(\text{bztpen})(\text{OH})]^{2+}$  optimised in a singlet electronic state and the crystal structure of the cation in **3**. The geometry is optimised at

BLYP/TZVP level of theory with the SDD Stuttgart/Dresden effective core potential basis set on Co. The hydrogen atoms have been omitted for clarity.

**Table S4** The Cartesian coordinates for the structure of **3** optimised at BLYP/TZVP level of theory with the SDD Stuttgart/Dresden effective core potential basis set on Co.  $G = -1540.760065 E_h$ ,  $\langle S^2 \rangle = 0$ .

|   |           |           |           |
|---|-----------|-----------|-----------|
| C | 2.228465  | 9.113309  | 10.794782 |
| H | 3.185789  | 9.297745  | 10.311496 |
| C | 1.230320  | 10.083044 | 10.915015 |
| H | 1.397700  | 11.078580 | 10.509364 |
| C | 0.035286  | 9.754036  | 11.564655 |
| H | -0.754680 | 10.494573 | 11.678629 |
| C | -0.132274 | 8.459982  | 12.077864 |
| H | -1.048525 | 8.179772  | 12.595117 |
| C | 0.894338  | 7.527341  | 11.918271 |
| C | 0.815701  | 6.080882  | 12.372814 |
| H | 0.134874  | 5.959664  | 13.226562 |
| H | 0.429851  | 5.455200  | 11.558028 |
| C | 5.334113  | 8.189330  | 12.651395 |
| H | 5.660396  | 8.359538  | 11.627516 |
| C | 5.915767  | 8.806012  | 13.757739 |
| H | 6.742213  | 9.498056  | 13.611320 |
| C | 5.424478  | 8.518212  | 15.037283 |
| H | 5.863045  | 8.983723  | 15.918378 |
| C | 4.354157  | 7.627896  | 15.169344 |
| H | 3.943145  | 7.391146  | 16.149735 |
| C | 3.808107  | 7.043224  | 14.021554 |
| C | 2.626389  | 6.098120  | 14.079148 |
| H | 1.775050  | 6.607899  | 14.548059 |
| H | 2.854590  | 5.235672  | 14.718908 |
| C | 1.494175  | 5.880050  | 8.975826  |
| H | 1.019134  | 6.807162  | 9.279454  |
| C | 1.008542  | 5.148559  | 7.894201  |
| H | 0.139396  | 5.510954  | 7.349515  |
| C | 1.653258  | 3.959309  | 7.532516  |
| H | 1.290570  | 3.361447  | 6.698120  |
| C | 2.780856  | 3.560299  | 8.254435  |
| H | 3.320773  | 2.652810  | 7.989683  |
| C | 3.233914  | 4.349143  | 9.318105  |
| C | 4.529210  | 4.073653  | 10.028705 |
| H | 5.331306  | 4.533946  | 9.438450  |
| H | 4.746838  | 2.999863  | 10.084836 |
| C | 3.905545  | 3.830832  | 12.449380 |

|    |          |          |           |
|----|----------|----------|-----------|
| H  | 4.394371 | 4.051185 | 13.403651 |
| H  | 4.078729 | 2.767225 | 12.240166 |
| C  | 2.403970 | 4.115447 | 12.560373 |
| H  | 1.863245 | 3.788411 | 11.667817 |
| H  | 1.980739 | 3.575360 | 13.420988 |
| C  | 6.065730 | 4.959719 | 11.763210 |
| H  | 6.360274 | 5.791146 | 11.115698 |
| H  | 6.060632 | 5.307769 | 12.800075 |
| C  | 7.013300 | 3.785978 | 11.593766 |
| C  | 7.141425 | 2.788097 | 12.581975 |
| H  | 6.560278 | 2.845093 | 13.503165 |
| C  | 8.046637 | 1.732843 | 12.417838 |
| H  | 8.142583 | 0.975220 | 13.194151 |
| C  | 8.845946 | 1.664183 | 11.268249 |
| H  | 9.556564 | 0.848294 | 11.146396 |
| C  | 8.746334 | 2.661480 | 10.289424 |
| H  | 9.385378 | 2.628520 | 9.408341  |
| C  | 7.837985 | 3.714078 | 10.452669 |
| H  | 7.795035 | 4.502729 | 9.699972  |
| Co | 3.416350 | 6.422994 | 11.260043 |
| N  | 2.054443 | 7.861532 | 11.278758 |
| N  | 4.304190 | 7.316493 | 12.789111 |
| N  | 4.580644 | 4.701534 | 11.397780 |
| N  | 2.580787 | 5.484830 | 9.693619  |
| N  | 2.207924 | 5.603988 | 12.701771 |
| O  | 4.630685 | 7.279474 | 10.092672 |
| H  | 4.345670 | 7.225123 | 9.162183  |



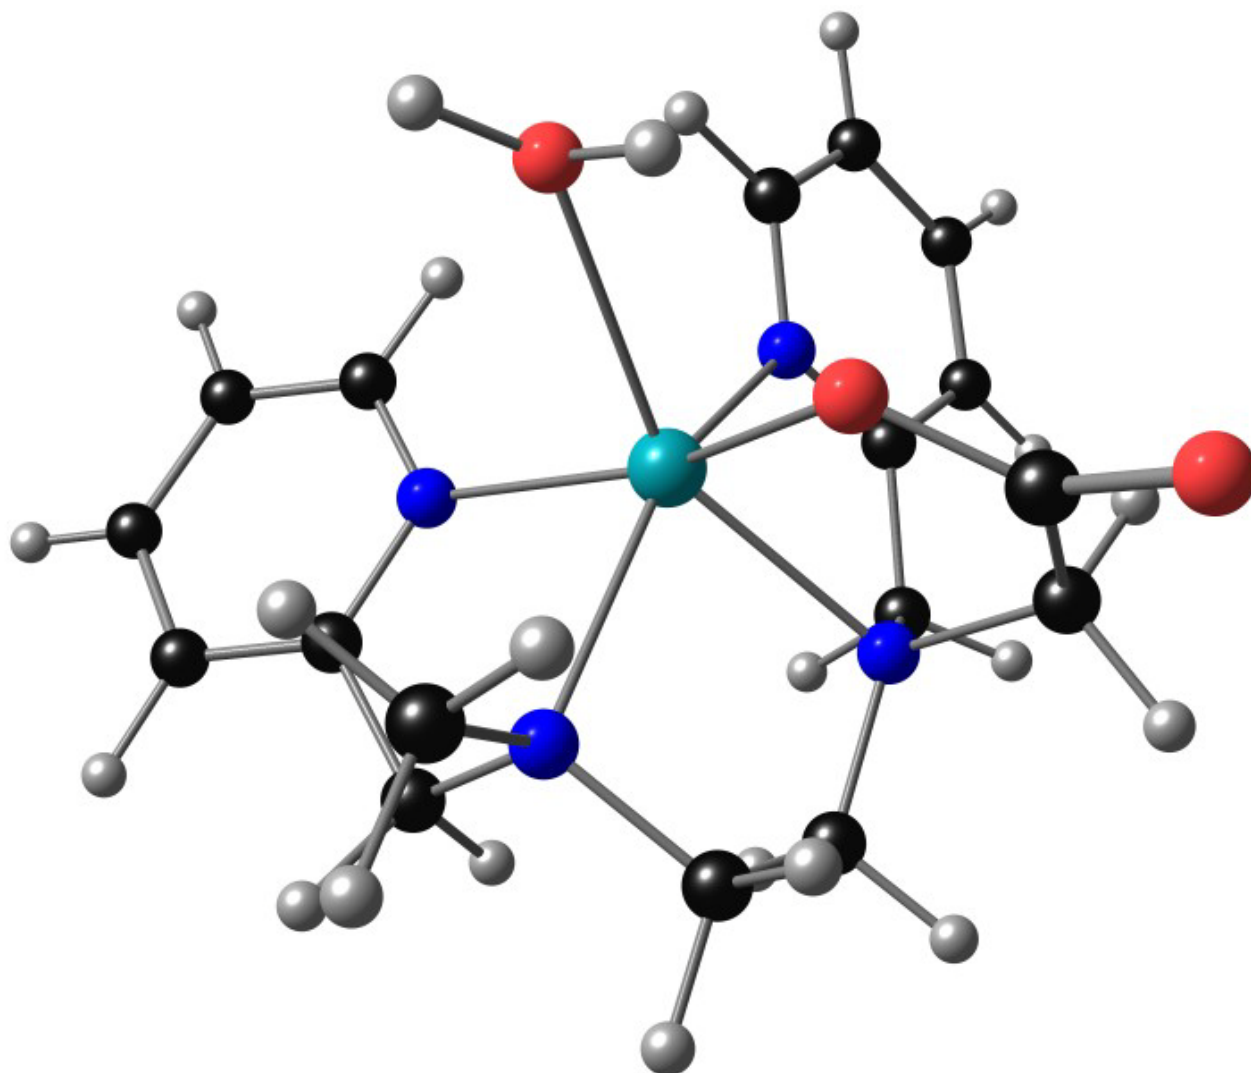

**Figure S8.** The geometry of a minimum for the coordination isomer of  $[\text{Co}^{\text{II}}(\text{mebpena})(\text{H}_2\text{O})]^+$  with the lowest free energy. The geometry is optimised at BLYP/TZVP level of theory with the SDD Stuttgart/Dresden effective core potential basis set on Co.

**Table S5** The Cartesian coordinates for the structure of  $[\text{Co}^{\text{II}}(\text{mebpena})(\text{H}_2\text{O})]^+$  for the coordination isomer with the lowest free energy optimised at BLYP/TZVP level of theory with the SDD Stuttgart/Dresden effective core potential basis set on Co.  $G = -1251.697585 E_h$ ,  $\langle S^2 \rangle = 3.76$ .

|    |           |           |           |
|----|-----------|-----------|-----------|
| Co | 0.033736  | -0.287099 | 0.418511  |
| N  | -1.659038 | 1.064912  | 0.303452  |
| N  | -1.620499 | -1.625967 | -0.341120 |
| N  | 1.013058  | -1.012793 | -1.458790 |
| N  | 1.535703  | 1.233778  | 0.048709  |
| O  | 1.073231  | -1.774902 | 1.207371  |
| O  | 2.458597  | -3.523317 | 0.790706  |
| C  | -1.699642 | 2.287682  | 0.885726  |
| H  | -0.763525 | 2.650557  | 1.302863  |
| C  | -2.863713 | 3.052942  | 0.959918  |

|   |           |           |           |
|---|-----------|-----------|-----------|
| H | -2.841103 | 4.030682  | 1.436555  |
| C | -4.045449 | 2.532255  | 0.420525  |
| H | -4.975398 | 3.096347  | 0.469159  |
| C | -4.012285 | 1.269867  | -0.180041 |
| H | -4.913447 | 0.832177  | -0.606962 |
| C | -2.803214 | 0.565621  | -0.230602 |
| C | -2.679649 | -0.768408 | -0.946620 |
| H | -3.650638 | -1.289053 | -0.964372 |
| H | -2.412435 | -0.564782 | -1.992669 |
| C | -2.179405 | -2.419798 | 0.797023  |
| H | -2.935901 | -3.140909 | 0.446003  |
| H | -2.651753 | -1.741015 | 1.516332  |
| H | -1.366992 | -2.955562 | 1.296852  |
| C | -0.974651 | -2.527877 | -1.350348 |
| H | -1.731375 | -3.041204 | -1.967808 |
| H | -0.435431 | -3.303178 | -0.795101 |
| C | -0.008645 | -1.753867 | -2.258661 |
| H | 0.467043  | -2.457706 | -2.961550 |
| H | -0.557414 | -1.022078 | -2.864987 |
| C | 2.115686  | -1.917234 | -0.973969 |
| H | 3.043414  | -1.334709 | -0.910013 |
| H | 2.292758  | -2.737856 | -1.682389 |
| C | 1.879719  | -2.501984 | 0.449517  |
| C | 1.539020  | 0.192029  | -2.162375 |
| H | 0.695168  | 0.680785  | -2.670987 |
| H | 2.279617  | -0.069012 | -2.935777 |
| C | 2.140977  | 1.171932  | -1.166217 |
| C | 3.242192  | 1.975838  | -1.479187 |
| H | 3.711410  | 1.897231  | -2.458635 |
| C | 3.736136  | 2.865313  | -0.518050 |
| H | 4.594015  | 3.497211  | -0.742137 |
| C | 3.123824  | 2.912456  | 0.738771  |
| H | 3.489349  | 3.572370  | 1.522652  |
| C | 2.031186  | 2.078433  | 0.983972  |
| H | 1.539912  | 2.051264  | 1.955323  |
| O | 0.076619  | 0.063065  | 2.779886  |
| H | -0.604477 | 0.037047  | 3.475404  |
| H | 0.592449  | -0.773051 | 2.853464  |

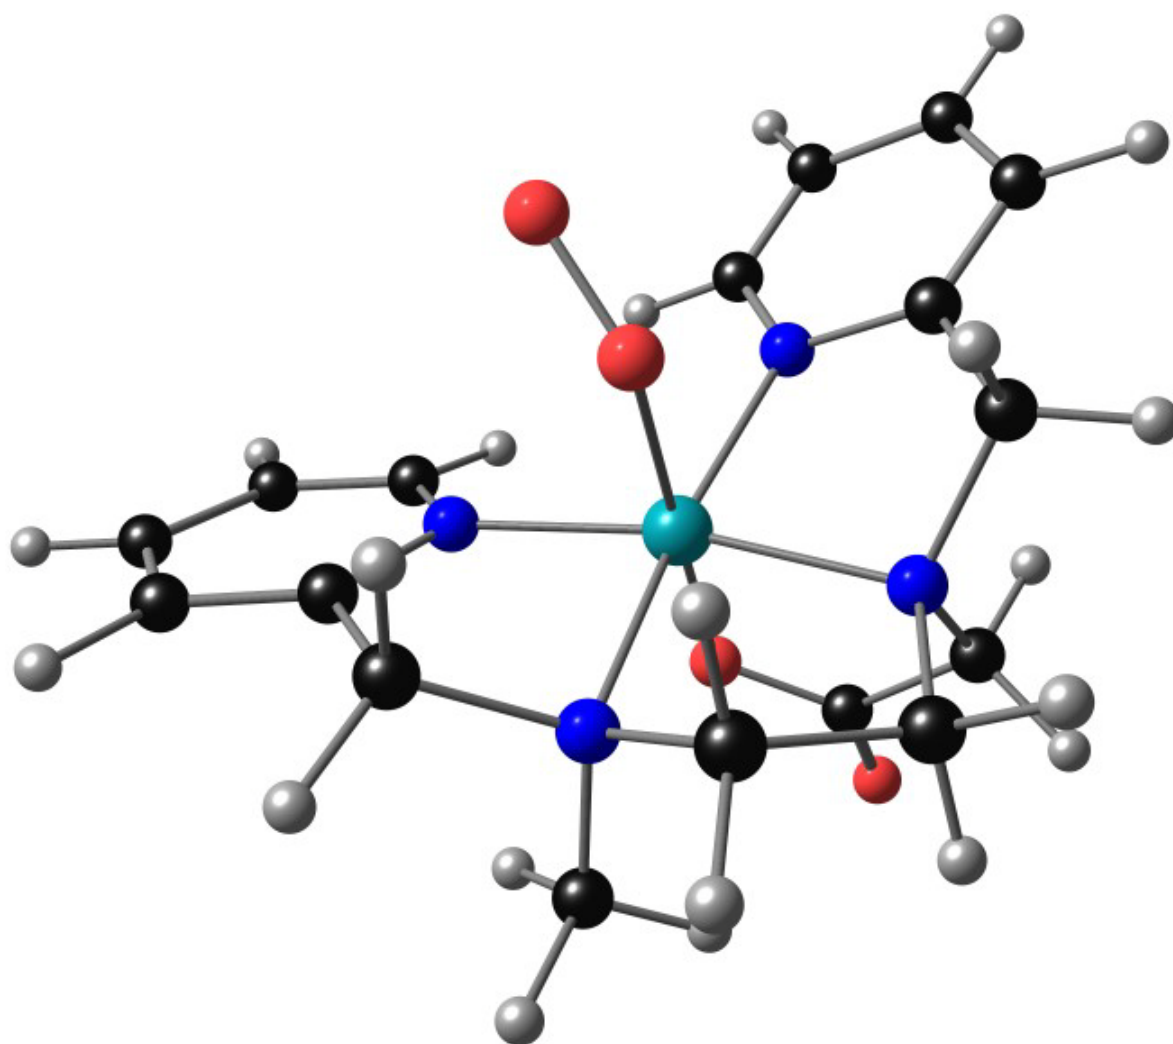

**Figure S9.** The geometry of a minimum of  $[\text{Co}^{\text{III}}(\text{O}_2)(\text{mebpena})]^+$ . The geometry is optimised at BLYP/TZVP level of theory with the SDD Stuttgart/Dresden effective core potential basis set on Co.

**Table S6** The Cartesian coordinates for the structure of  $[\text{Co}^{\text{III}}(\text{O}_2)(\text{mebpena})]^+$  optimised at BLYP/TZVP level of theory with the SDD Stuttgart/Dresden effective core potential basis set on Co.  $G = 1325.652644 E_h$ ,  $\langle S^2 \rangle = 0.77$ .

|    |           |            |          |
|----|-----------|------------|----------|
| Co | -1.137809 | -2.390818  | 2.765145 |
| O  | -0.389449 | -1.356254  | 1.278297 |
| N  | -0.821794 | -0.875299  | 4.029188 |
| N  | 0.784336  | -2.83785 0 | 3.241204 |
| N  | -1.186052 | -4.095936  | 1.709999 |
| N  | -2.913233 | -2.106842  | 1.819728 |
| O  | -1.904451 | -3.429832  | 4.234981 |
| O  | -2.707234 | -5.482073  | 4.748538 |
| C  | -1.731526 | -0.195215  | 4.759430 |
| H  | -2.766952 | -0.502488  | 4.654178 |
| C  | -1.369298 | 0.826633   | 5.637240 |
| H  | -2.139283 | 1.349810   | 6.199647 |

|   |           |           |           |
|---|-----------|-----------|-----------|
| C | -0.015856 | 1.143782  | 5.784695  |
| H | 0.298436  | 1.937044  | 6.460644  |
| C | 0.933178  | 0.401975  | 5.073645  |
| H | 1.997878  | 0.592936  | 5.195395  |
| C | 0.503844  | -0.606482 | 4.208408  |
| C | 1.446842  | -1.491604 | 3.422756  |
| H | 1.627687  | -1.060850 | 2.431799  |
| H | 2.412813  | -1.600229 | 3.935312  |
| C | 0.977262  | -3.659235 | 4.486319  |
| H | 2.053454  | -3.797437 | 4.665296  |
| H | 0.496810  | -4.633076 | 4.385390  |
| H | 0.515161  | -3.149577 | 5.334436  |
| C | 1.264854  | -3.570960 | 2.009008  |
| H | 1.374017  | -2.832958 | 1.209784  |
| H | 2.246420  | -4.034920 | 2.189332  |
| C | 0.234480  | -4.642110 | 1.625523  |
| H | 0.434318  | -5.019966 | 0.613978  |
| H | 0.296756  | -5.495925 | 2.306480  |
| C | -2.103177 | -5.052332 | 2.455082  |
| H | -1.744622 | -6.082895 | 2.357154  |
| H | -3.102270 | -5.007464 | 2.008119  |
| C | -2.257599 | -4.667512 | 3.954026  |
| C | -1.777441 | -3.709609 | 0.382358  |
| H | -2.062269 | -4.602137 | -0.193795 |
| H | -1.020337 | -3.152681 | -0.183926 |
| C | -2.971369 | -2.816312 | 0.654101  |
| C | -4.056323 | -2.705547 | -0.217211 |
| H | -4.076422 | -3.291681 | -1.134324 |
| C | -5.107816 | -1.840472 | 0.105137  |
| H | -5.961347 | -1.737607 | -0.562576 |
| C | -5.046484 | -1.121060 | 1.300991  |
| H | -5.843266 | -0.442674 | 1.597316  |
| C | -3.934652 | -1.281314 | 2.129647  |
| H | -3.856309 | -0.735059 | 3.063094  |
| O | -0.830545 | -0.125061 | 1.127439  |

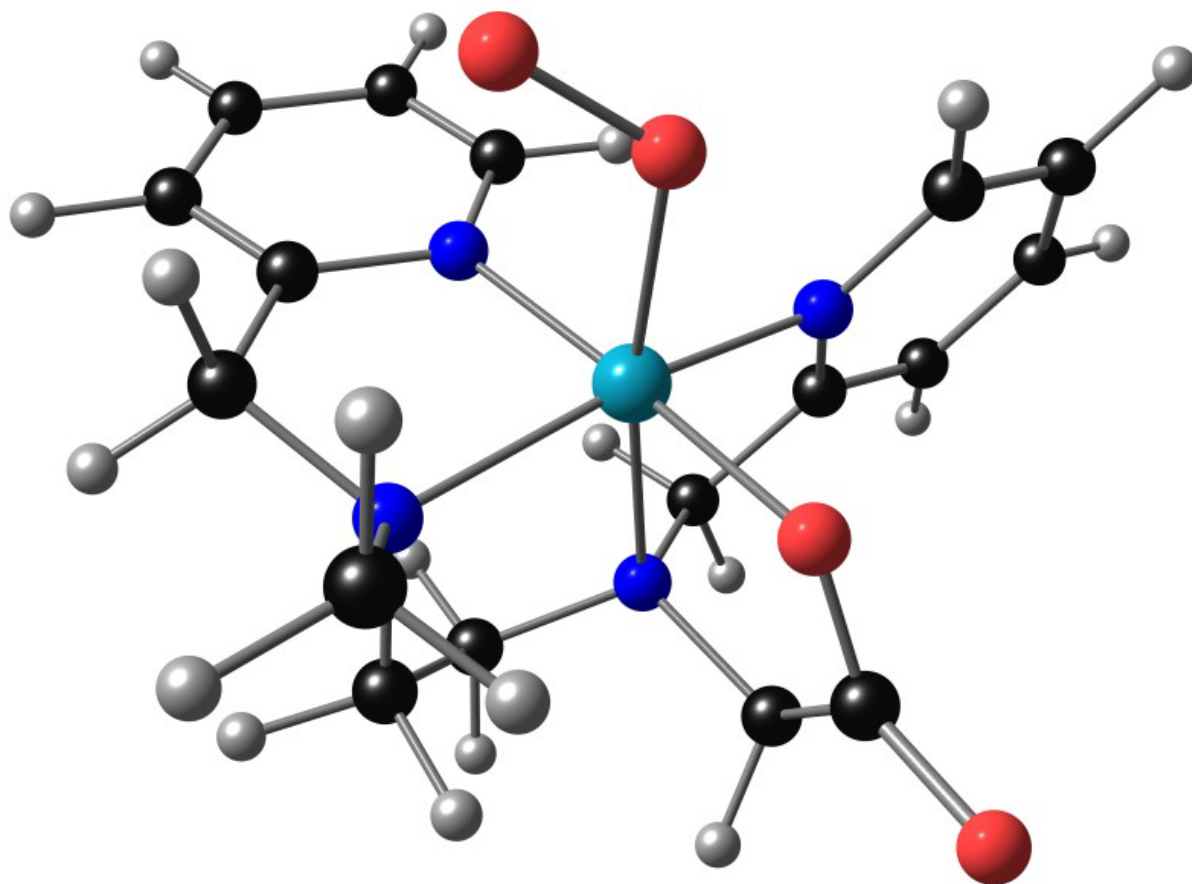

**Figure S10.** The geometry of a minimum for the coordination isomer of [Co<sup>III</sup>(O<sub>2</sub>)(mebpena)]<sup>+</sup> with the lowest free energy. The geometry is optimised at BLYP/TZVP level of theory with the SDD Stuttgart/Dresden effective core potential basis set on Co.

**Table S7** The Cartesian coordinates for the structure of [Co<sup>III</sup>(O<sub>2</sub>)(mebpena)]<sup>+</sup> for the coordination isomer with the lowest free energy optimised at BLYP/TZVP level of theory with the SDD Stuttgart/Dresden effective core potential basis set on Co.  $G = -1325.660224 E_h$ ,  $\langle S^2 \rangle = 0.78$ .

|    |           |           |           |
|----|-----------|-----------|-----------|
| Co | 0.011947  | -0.329335 | 0.440902  |
| O  | -0.312724 | 0.016335  | 2.299598  |
| N  | -1.444863 | 0.980611  | -0.043618 |
| N  | -1.448296 | -1.751688 | 0.085658  |
| N  | 0.703836  | -0.696800 | -1.505080 |
| N  | 1.482589  | 0.998406  | 0.398300  |
| O  | 1.249208  | -1.687759 | 0.968084  |
| O  | 2.789162  | -3.170363 | 0.253503  |
| C  | -1.324672 | 2.327564  | -0.167108 |
| H  | -0.333947 | 2.740751  | -0.003127 |
| C  | -2.405578 | 3.150853  | -0.473381 |
| H  | -2.257519 | 4.225584  | -0.552259 |

|   |           |           |           |
|---|-----------|-----------|-----------|
| C | -3.664635 | 2.571077  | -0.669803 |
| H | -4.527834 | 3.186103  | -0.918139 |
| C | -3.797166 | 1.188325  | -0.526980 |
| H | -4.764607 | 0.704583  | -0.650792 |
| C | -2.675058 | 0.419378  | -0.195631 |
| C | -2.780220 | -1.047845 | 0.135006  |
| H | -3.137647 | -1.113602 | 1.170052  |
| H | -3.512488 | -1.559434 | -0.506818 |
| C | -1.473523 | -2.894965 | 1.069539  |
| H | -2.258032 | -3.613343 | 0.788918  |
| H | -1.677751 | -2.493360 | 2.065184  |
| H | -0.498199 | -3.384067 | 1.079934  |
| C | -1.149505 | -2.297012 | -1.303691 |
| H | -2.071304 | -2.680037 | -1.764985 |
| H | -0.477605 | -3.150813 | -1.170273 |
| C | -0.487520 | -1.253412 | -2.214262 |
| H | -0.206900 | -1.725003 | -3.169784 |
| H | -1.171718 | -0.428039 | -2.438865 |
| C | 1.835393  | -1.693560 | -1.390402 |
| H | 2.779319  | -1.210196 | -1.667080 |
| H | 1.687227  | -2.524028 | -2.091424 |
| C | 2.001632  | -2.259135 | 0.043522  |
| C | 1.189264  | 0.631320  | -1.989086 |
| H | 0.316560  | 1.235824  | -2.269764 |
| H | 1.826303  | 0.534947  | -2.880918 |
| C | 1.944866  | 1.299189  | -0.850038 |
| C | 3.034809  | 2.153505  | -1.026602 |
| H | 3.396630  | 2.372285  | -2.029835 |
| C | 3.660356  | 2.705221  | 0.099529  |
| H | 4.514851  | 3.369404  | -0.018479 |
| C | 3.187806  | 2.373722  | 1.373214  |
| H | 3.658709  | 2.765360  | 2.272069  |
| C | 2.097334  | 1.509036  | 1.488741  |
| H | 1.691401  | 1.201910  | 2.450594  |
| O | -1.517631 | -0.116644 | 2.779693  |

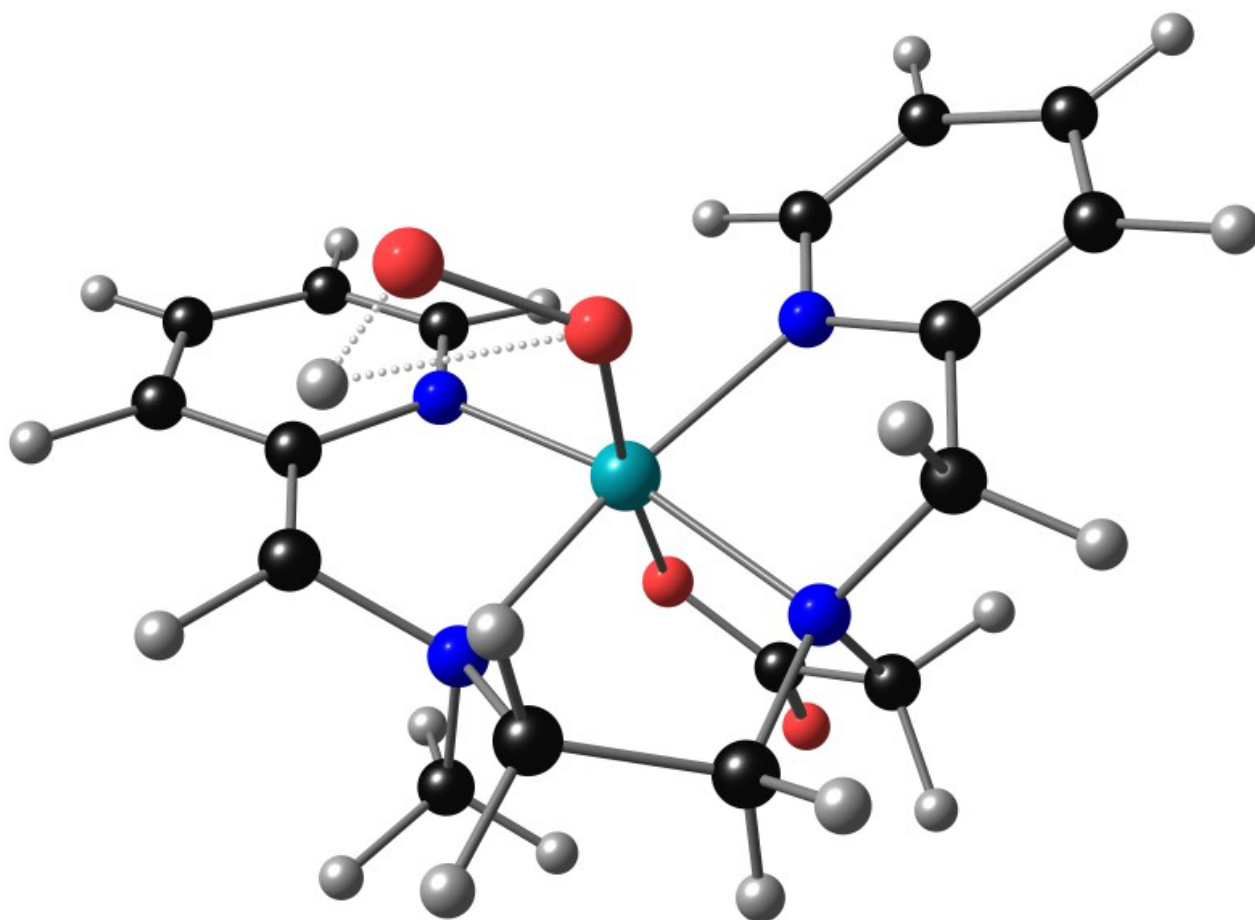

**Figure S11.** The geometry of the transition state of the hydrogen abstraction for mebpna<sup>-</sup>. The geometry is optimised at BLYP/TZVP level of theory with the SDD Stuttgart/Dresden effective core potential basis set on Co.

**Table S8** The Cartesian coordinates for the structure of the transition state of the hydrogen abstraction for mebpna<sup>-</sup> optimised at BLYP/TZVP level of theory with the SDD Stuttgart/Dresden effective core potential basis set on Co.  $G = -1325.64059 E_h$ ,  $\langle S^2 \rangle = 0.76$

|    |           |           |          |
|----|-----------|-----------|----------|
| Co | -1.142364 | -2.390174 | 2.750996 |
| O  | -0.508496 | -1.480574 | 1.169749 |
| N  | -0.822337 | -0.884855 | 4.014781 |
| N  | 0.763991  | -2.868133 | 3.248767 |
| N  | -1.202489 | -4.114740 | 1.704979 |
| N  | -2.943416 | -2.116928 | 1.825103 |
| O  | -1.919603 | -3.385900 | 4.208317 |
| O  | -2.755308 | -5.405065 | 4.775953 |
| C  | -1.714094 | -0.164129 | 4.722820 |
| H  | -2.758623 | -0.438745 | 4.613549 |
| C  | -1.333499 | 0.871875  | 5.575417 |

|   |           |           |           |
|---|-----------|-----------|-----------|
| H | -2.093812 | 1.429773  | 6.116252  |
| C | 0.033568  | 1.168388  | 5.713933  |
| H | 0.357828  | 1.978718  | 6.364659  |
| C | 0.970117  | 0.393329  | 5.041386  |
| H | 2.037544  | 0.564867  | 5.165451  |
| C | 0.532967  | -0.668959 | 4.213490  |
| C | 1.390338  | -1.552247 | 3.478724  |
| H | 2.469922  | -1.547518 | 3.637138  |
| C | 0.914711  | -3.733371 | 4.482204  |
| H | 1.985185  | -3.841637 | 4.702690  |
| H | 0.474873  | -4.720013 | 4.319217  |
| H | 0.398699  | -3.262781 | 5.320166  |
| C | 1.267786  | -3.591985 | 2.016046  |
| H | 1.433000  | -2.847709 | 1.235198  |
| H | 2.226517  | -4.085807 | 2.234382  |
| C | 0.227699  | -4.639593 | 1.580430  |
| H | 0.419454  | -4.952600 | 0.546212  |
| H | 0.300912  | -5.533017 | 2.207148  |
| C | -2.090664 | -5.070970 | 2.481946  |
| H | -1.693943 | -6.090862 | 2.436430  |
| H | -3.085953 | -5.086766 | 2.024264  |
| C | -2.279309 | -4.632336 | 3.957912  |
| C | -1.839193 | -3.752668 | 0.390024  |
| H | -2.143987 | -4.658370 | -0.153859 |
| H | 1.043781  | -0.756035 | 2.118875  |
| C | -3.025459 | -2.852685 | 0.677723  |
| C | -4.132828 | -2.763516 | -0.168188 |
| H | -4.174666 | -3.372008 | -1.069882 |
| C | -5.177559 | -1.892335 | 0.158425  |
| H | -6.046826 | -1.806043 | -0.491104 |
| C | -5.089817 | -1.145886 | 1.336180  |
| H | -5.880653 | -0.462228 | 1.636320  |
| C | -3.959473 | -1.288069 | 2.142790  |
| H | -3.861613 | -0.724712 | 3.064260  |
| O | 0.451905  | -0.464426 | 1.265338  |
| H | -1.102766 | -3.207864 | -0.211404 |



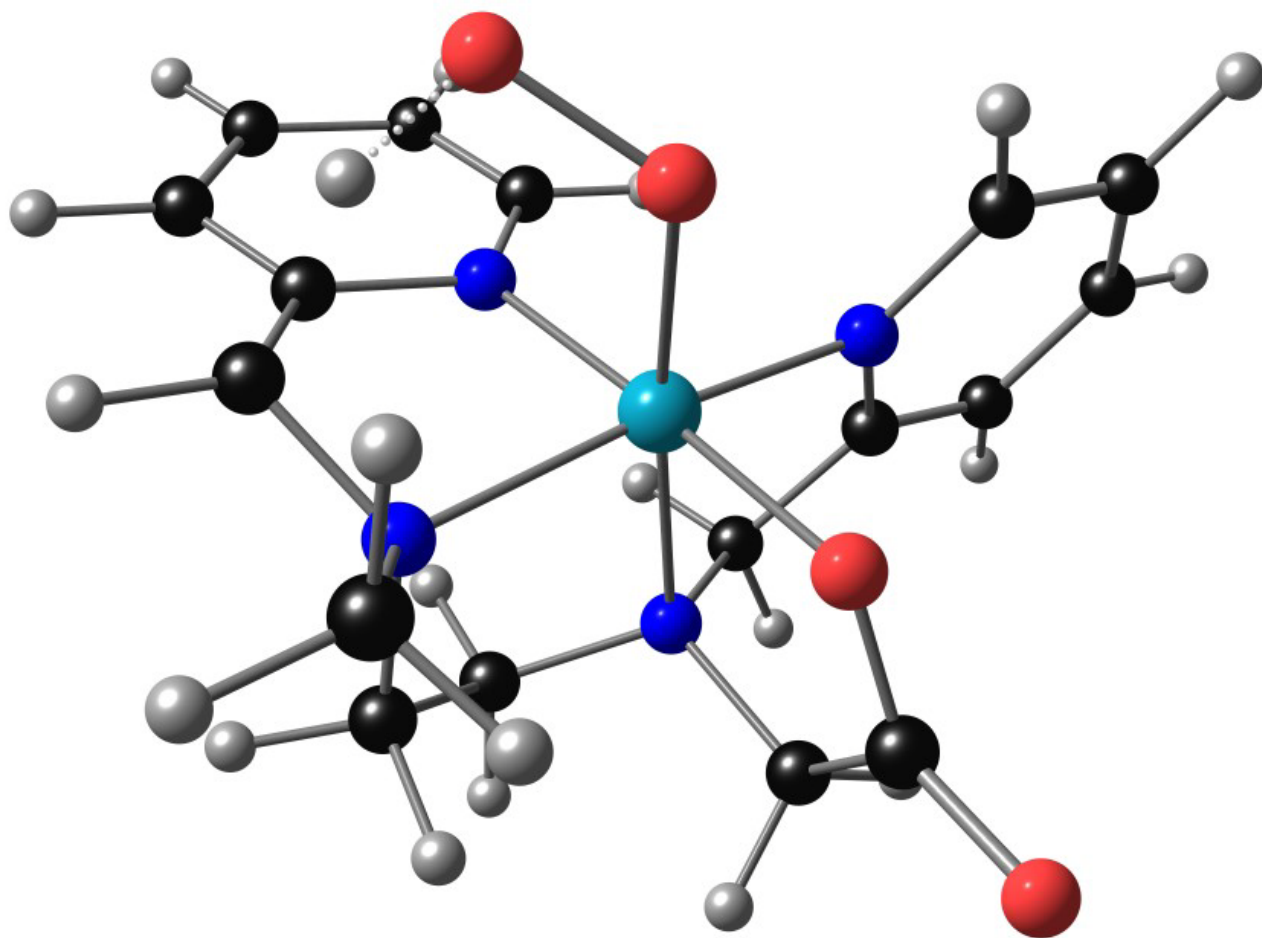

**Figure S12.** The geometry of the transition state of the hydrogen abstraction for mebpna<sup>-</sup> for the coordination isomer with the lowest free energy. The geometry is optimised at BLYP/TZVP level of theory with the SDD Stuttgart/Dresden effective core potential basis set on Co.

**Table S9** The Cartesian coordinates for the structure of the coordination isomer for the transition state of the hydrogen abstraction for mebpna<sup>-</sup> with the lowest free energy, optimised at BLYP/TZVP level of theory with the SDD Stuttgart/Dresden effective core potential basis set on Co.  $G = -1325.622524 E_h$ ,  $\langle S^2 \rangle = 0.76$

|    |          |          |          |
|----|----------|----------|----------|
| Co | 3.936184 | 2.855750 | 3.590145 |
| O  | 5.786478 | 3.065205 | 3.889347 |
| N  | 4.195259 | 2.373766 | 1.646566 |
| N  | 3.744785 | 4.766944 | 2.870246 |
| N  | 1.883548 | 2.698414 | 3.554314 |
| N  | 3.818340 | 0.979005 | 4.205113 |
| O  | 3.713808 | 3.441332 | 5.398214 |
| O  | 2.221739 | 3.880428 | 7.026723 |
| C  | 4.285363 | 1.150308 | 1.071298 |
| H  | 4.156256 | 0.294452 | 1.728211 |

|   |          |           |           |
|---|----------|-----------|-----------|
| C | 4.549969 | 0.975164  | -0.283257 |
| H | 4.618159 | -0.029156 | -0.693960 |
| C | 4.738974 | 2.113722  | -1.090193 |
| H | 4.941517 | 2.005818  | -2.154530 |
| C | 4.672045 | 3.374982  | -0.515681 |
| H | 4.825579 | 4.273772  | -1.109627 |
| C | 4.403538 | 3.500377  | 0.870961  |
| C | 4.511576 | 4.718182  | 1.618299  |
| H | 4.650332 | 5.672121  | 1.106563  |
| C | 4.289990 | 5.866096  | 3.750327  |
| H | 3.795610 | 5.839468  | 4.722633  |
| H | 5.360395 | 5.711195  | 3.896867  |
| H | 4.119422 | 6.837511  | 3.264577  |
| C | 2.233669 | 4.983512  | 2.688667  |
| H | 1.882862 | 5.488005  | 3.595514  |
| H | 2.062309 | 5.662284  | 1.842832  |
| C | 1.469308 | 3.670596  | 2.487707  |
| H | 1.695107 | 3.224941  | 1.514903  |
| H | 0.386229 | 3.865417  | 2.529626  |
| C | 1.363411 | 3.073096  | 4.927794  |
| H | 0.631678 | 3.885608  | 4.846257  |
| H | 0.840561 | 2.218647  | 5.371837  |
| C | 2.490717 | 3.504914  | 5.895756  |
| C | 1.603544 | 1.256448  | 3.245891  |
| H | 0.567874 | 0.987051  | 3.497268  |
| H | 1.732554 | 1.104218  | 2.166788  |
| C | 2.597645 | 0.401034  | 4.014970  |
| C | 2.329015 | -0.882415 | 4.493689  |
| H | 1.345603 | -1.324727 | 4.343853  |
| C | 3.335381 | -1.579565 | 5.175822  |
| H | 3.143942 | -2.580264 | 5.559405  |
| C | 4.578012 | -0.968753 | 5.373330  |
| H | 5.377645 | -1.472745 | 5.911460  |
| C | 4.786692 | 0.320878  | 4.880127  |
| H | 5.723153 | 0.857656  | 5.016126  |
| O | 6.548122 | 3.541748  | 2.842278  |
| H | 5.856799 | 4.186670  | 2.226529  |

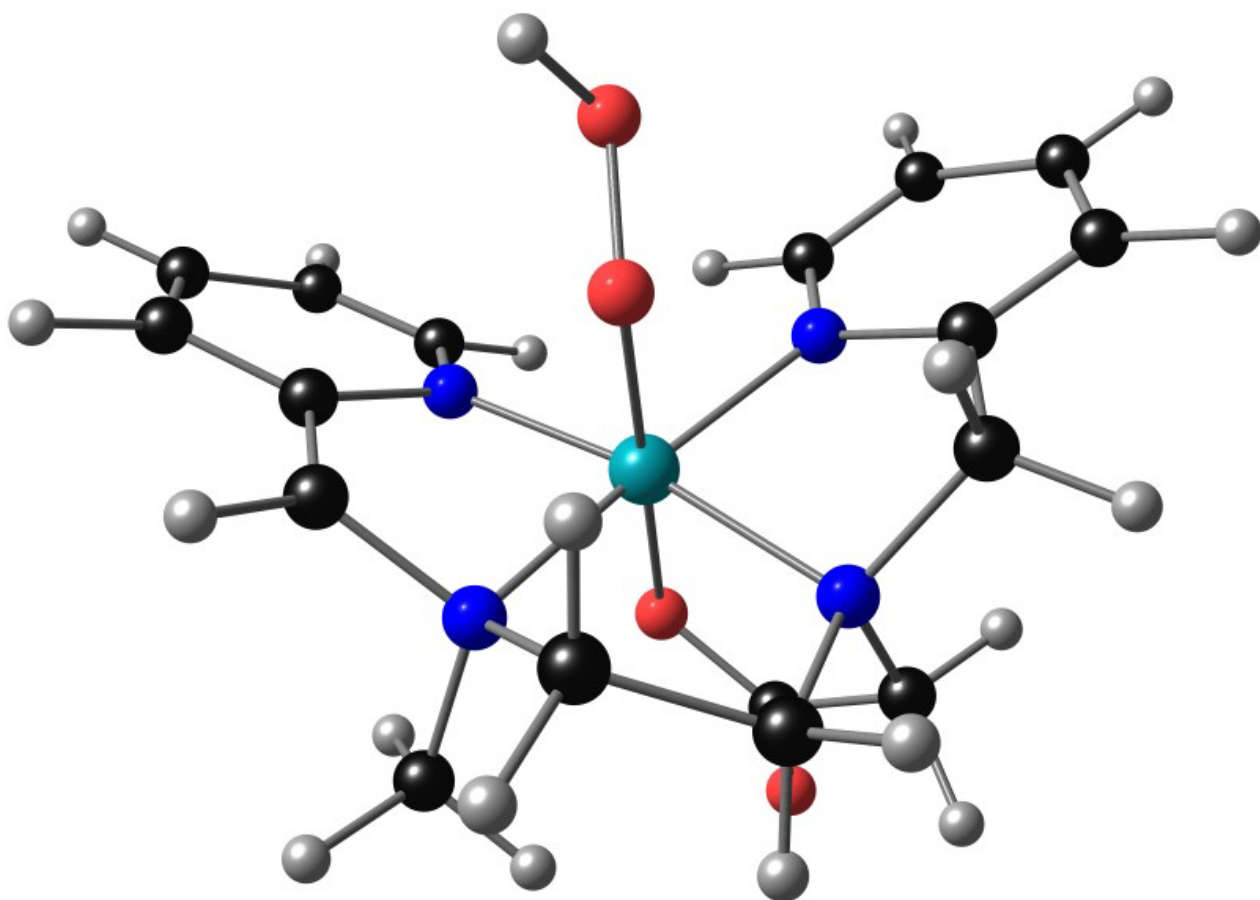

**Figure S13.** The geometry of a minimum of  $[\text{Co}^{\text{III}}(\text{OOH})(\text{mebpena-H}^{\bullet})]^+$ . The geometry is optimised at BLYP/TZVP level of theory with the SDD Stuttgart/Dresden effective core potential basis set on Co.

**Table S10** The Cartesian coordinates for the structure of  $[\text{Co}^{\text{III}}(\text{OOH})(\text{mebpena-H}^{\bullet})]^+$  optimised at BLYP/TZVP level of theory with the SDD Stuttgart/Dresden effective core potential basis set on Co.  $G = -1325.631713 E_h$ ,  $\langle S^2 \rangle = 0.76$ .

|    |           |           |           |
|----|-----------|-----------|-----------|
| Co | 0.062002  | -0.221301 | -0.023772 |
| O  | 0.228879  | 0.294416  | -1.880250 |
| N  | 1.740315  | 0.736677  | 0.391975  |
| N  | 1.323909  | -1.688707 | -0.584138 |
| N  | -1.456797 | -1.475789 | -0.426613 |
| N  | -1.454719 | 1.106730  | 0.116577  |
| O  | -0.096797 | -0.804211 | 1.803047  |
| O  | -1.334375 | -2.094488 | 3.184981  |
| C  | 1.996149  | 1.729726  | 1.258310  |
| H  | 1.190635  | 2.003704  | 1.934633  |
| C  | 3.231837  | 2.381826  | 1.306806  |

|   |           |           |           |
|---|-----------|-----------|-----------|
| H | 3.388749  | 3.184451  | 2.023017  |
| C | 4.243435  | 1.989150  | 0.410408  |
| H | 5.204572  | 2.500424  | 0.409358  |
| C | 4.020777  | 0.918328  | -0.444791 |
| H | 4.803501  | 0.551003  | -1.105855 |
| C | 2.766528  | 0.249815  | -0.413062 |
| C | 2.461487  | -0.938434 | -1.099177 |
| H | 3.115087  | -1.408991 | -1.830875 |
| C | 1.788716  | -2.631838 | 0.508257  |
| H | 2.558370  | -3.300328 | 0.099529  |
| H | 0.949179  | -3.223823 | 0.880467  |
| H | 2.190769  | -2.047467 | 1.337289  |
| C | 0.537472  | -2.417578 | -1.657302 |
| H | 0.516330  | -1.763497 | -2.532085 |
| H | 1.037477  | -3.359769 | -1.926403 |
| C | -0.880393 | -2.694065 | -1.136519 |
| H | -1.538009 | -2.995708 | -1.962835 |
| H | -0.870659 | -3.515962 | -0.414456 |
| C | -2.083752 | -1.848090 | 0.903787  |
| H | -2.421279 | -2.890335 | 0.896496  |
| H | -2.964323 | -1.218377 | 1.072132  |
| C | -1.112804 | -1.599582 | 2.089780  |
| C | -2.402166 | -0.659307 | -1.264216 |
| H | -1.960469 | -0.543446 | -2.260624 |
| C | -2.534401 | 0.702901  | -0.613325 |
| C | -3.669336 | 1.505882  | -0.740887 |
| H | -4.519450 | 1.152372  | -1.321671 |
| C | -3.698180 | 2.755793  | -0.112686 |
| H | -4.572899 | 3.397495  | -0.202739 |
| C | -2.592624 | 3.158374  | 0.641025  |
| H | -2.574720 | 4.115910  | 1.156475  |
| C | -1.491193 | 2.306140  | 0.732342  |
| H | -0.615806 | 2.587020  | 1.307746  |
| O | 0.315076  | 1.770601  | -2.003817 |
| H | 0.911156  | 1.835562  | -2.779022 |
| H | -3.376681 | -1.161593 | -1.353110 |

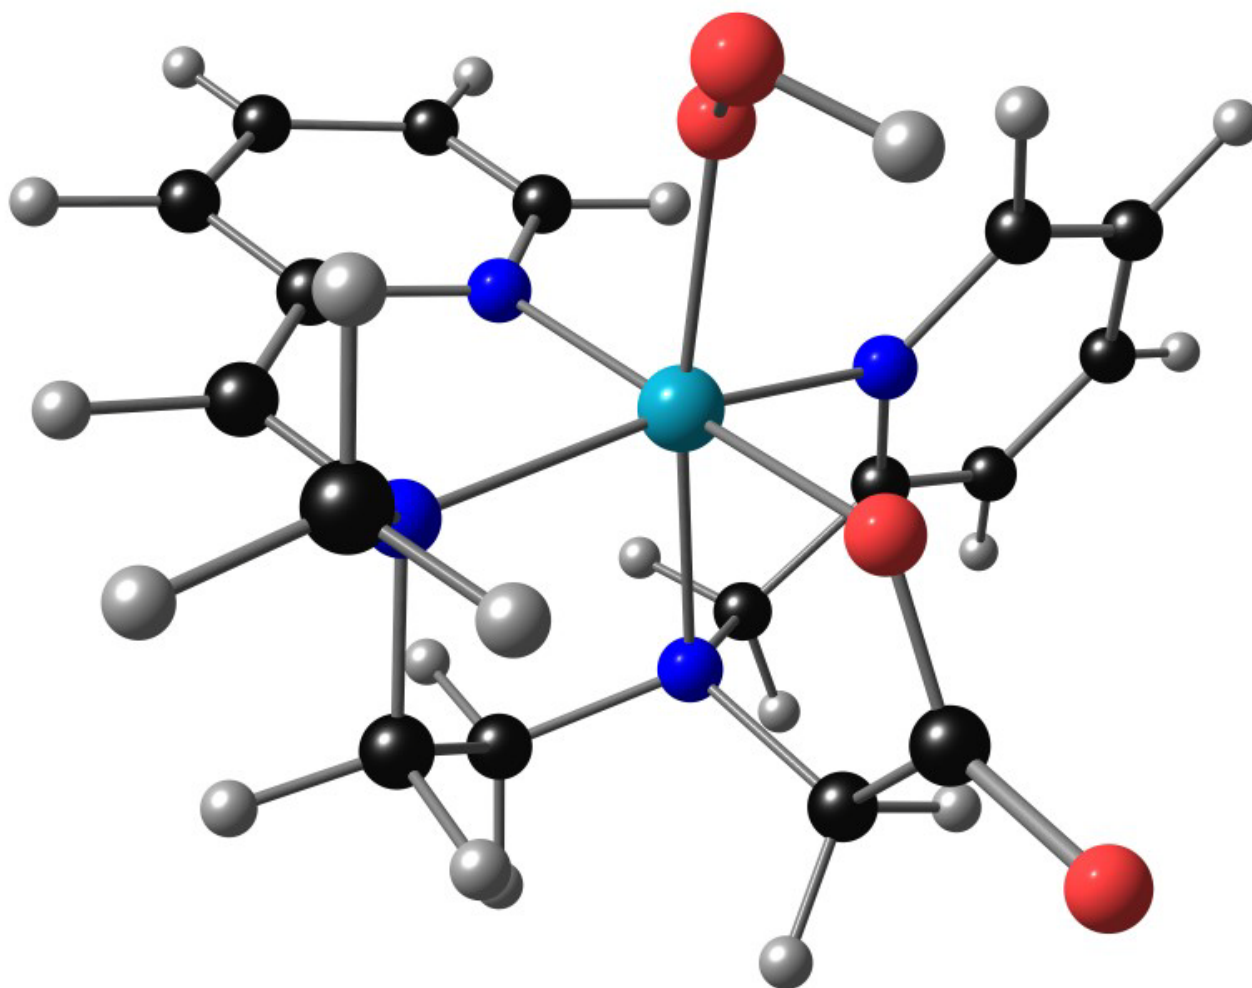

**Figure S14.** The geometry of the minimum for the coordination isomer of  $[\text{Co}^{\text{III}}(\text{OOH})(\text{mebpena-H})]^+$  with the lowest free energy. The geometry is optimised at BLYP/TZVP level of theory with the SDD Stuttgart/Dresden effective core potential basis set on Co.

**Table S11** The Cartesian coordinates for the structure of  $[\text{Co}^{\text{III}}(\text{OOH})(\text{mebpena-H})]^+$  for the coordination isomer with the lowest free energy optimised at BLYP/TZVP level of theory with the SDD Stuttgart/Dresden effective core potential basis set on Co.  $G = -1325.639534 E_h$ ,  $\langle S^2 \rangle = 0.76$ .

|    |          |          |          |
|----|----------|----------|----------|
| Co | 3.950454 | 2.869375 | 3.623599 |
| O  | 5.837720 | 2.807989 | 3.866409 |
| N  | 4.366278 | 2.436273 | 1.715652 |
| N  | 3.725082 | 4.809901 | 2.898147 |
| N  | 1.870043 | 2.729401 | 3.581453 |
| N  | 3.770414 | 0.970160 | 4.166971 |
| O  | 3.721896 | 3.455787 | 5.428430 |
| O  | 2.225020 | 3.913898 | 7.053952 |
| C  | 4.708179 | 1.245035 | 1.193902 |

|   |          |           |           |
|---|----------|-----------|-----------|
| H | 4.609002 | 0.383053  | 1.847487  |
| C | 5.186049 | 1.090847  | -0.113935 |
| H | 5.447627 | 0.098383  | -0.473150 |
| C | 5.334530 | 2.227380  | -0.928624 |
| H | 5.710024 | 2.134092  | -1.945968 |
| C | 5.005580 | 3.470696  | -0.410915 |
| H | 5.120547 | 4.377158  | -1.002108 |
| C | 4.527052 | 3.573749  | 0.928689  |
| C | 4.218568 | 4.792499  | 1.536804  |
| H | 4.353744 | 5.748610  | 1.031173  |
| C | 4.414070 | 5.920385  | 3.659285  |
| H | 4.068599 | 5.899072  | 4.695592  |
| H | 5.489397 | 5.737450  | 3.644821  |
| H | 4.171518 | 6.888862  | 3.197800  |
| C | 2.211569 | 5.065929  | 2.913894  |
| H | 1.973014 | 5.443377  | 3.913912  |
| H | 1.959296 | 5.854370  | 2.190872  |
| C | 1.432500 | 3.783817  | 2.615831  |
| H | 1.642562 | 3.428491  | 1.600477  |
| H | 0.350604 | 3.978357  | 2.689842  |
| C | 1.383037 | 2.995567  | 4.991194  |
| H | 0.552629 | 3.712171  | 4.982328  |
| H | 0.995808 | 2.065594  | 5.422809  |
| C | 2.499854 | 3.509986  | 5.934087  |
| C | 1.587503 | 1.321280  | 3.162338  |
| H | 0.543060 | 1.035570  | 3.357438  |
| H | 1.756956 | 1.245757  | 2.079629  |
| C | 2.554616 | 0.411427  | 3.902397  |
| C | 2.264783 | -0.897304 | 4.292589  |
| H | 1.285095 | -1.323078 | 4.082393  |
| C | 3.245181 | -1.641643 | 4.963138  |
| H | 3.036597 | -2.662279 | 5.279595  |
| C | 4.484612 | -1.052242 | 5.233222  |
| H | 5.265977 | -1.594942 | 5.760729  |
| C | 4.715655 | 0.263120  | 4.824008  |
| H | 5.652747 | 0.792153  | 4.989019  |
| O | 6.378849 | 3.884873  | 4.680277  |
| H | 5.987253 | 3.696760  | 5.564109  |

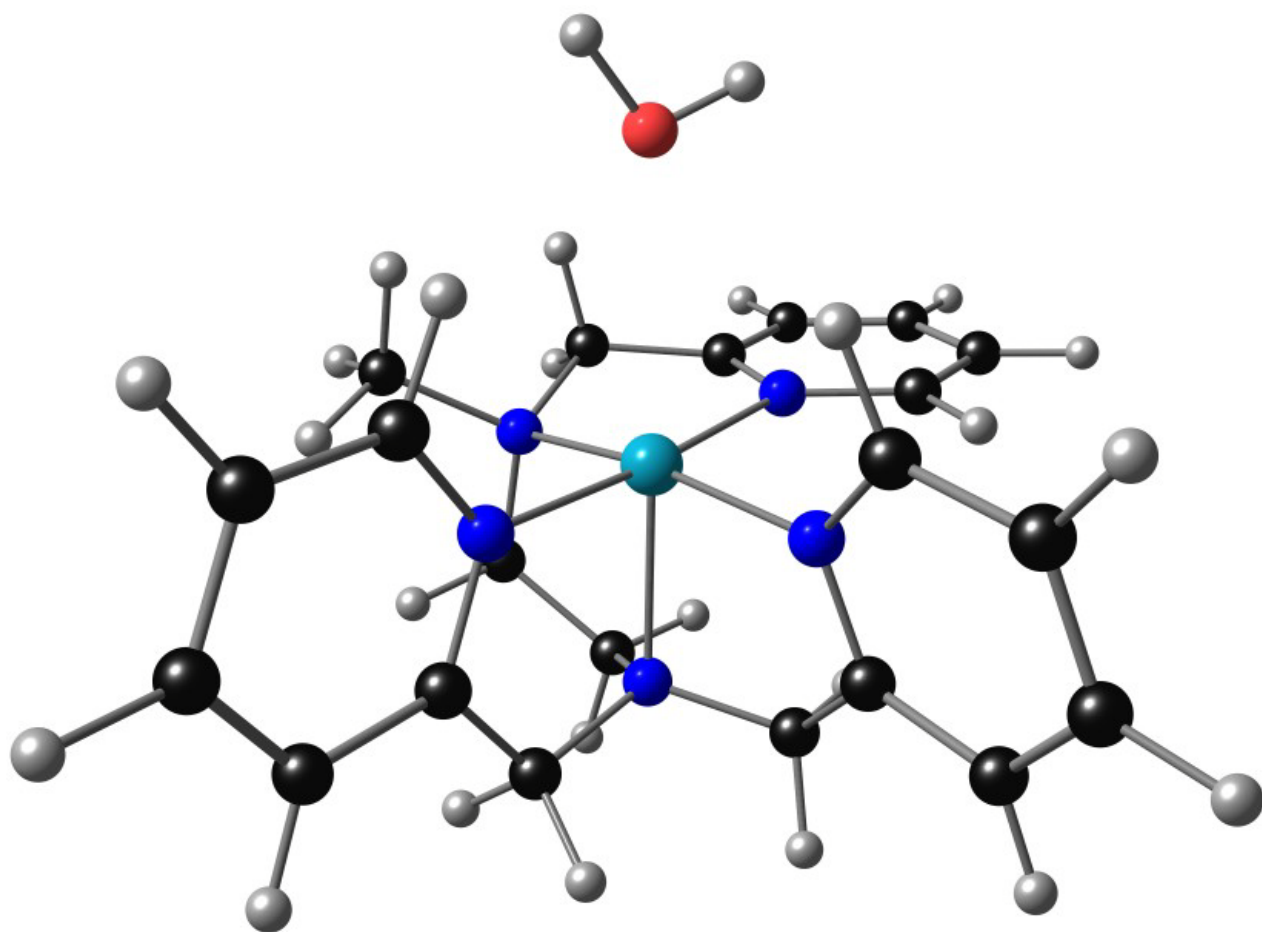

**Figure S15.** The geometry of a minimum of  $[\text{Co}^{\text{II}}(\text{metpen})(\text{H}_2\text{O})]^{2+}$ . The geometry is optimised at BLYP/TZVP level of theory with the SDD Stuttgart/Dresden effective core potential basis set on Co.

**Table S12** The Cartesian coordinates for the structure of  $[\text{Co}^{\text{II}}(\text{metpen})(\text{H}_2\text{O})]^{2+}$  optimised at BLYP/TZVP level of theory with the SDD Stuttgart/Dresden effective core potential basis set on Co.  $G = -1310.405623 E_h$ ,  $\langle S^2 \rangle = 0.76$ .

|   |           |           |            |
|---|-----------|-----------|------------|
| C | 2.088657  | 9.080435  | -10.873250 |
| H | 3.010192  | 9.312500  | -10.342499 |
| C | 1.075598  | 10.025017 | -11.043263 |
| H | 1.198871  | 11.026822 | -10.637345 |
| C | -0.079128 | 9.660740  | -11.745089 |
| H | -0.882970 | 10.378215 | -11.900985 |
| C | -0.183812 | 8.359854  | -12.253525 |
| H | -1.067076 | 8.050629  | -12.810320 |
| C | 0.857860  | 7.451924  | -12.043700 |
| C | 0.798462  | 6.000676  | -12.510518 |
| H | 0.105989  | 5.898340  | -13.360068 |

|    |          |          |            |
|----|----------|----------|------------|
| H  | 0.400768 | 5.378150 | -11.697496 |
| C  | 5.268459 | 8.207225 | -12.689370 |
| H  | 5.579677 | 8.427283 | -11.671226 |
| C  | 5.856437 | 8.828881 | -13.787418 |
| H  | 6.654375 | 9.552615 | -13.635968 |
| C  | 5.400070 | 8.504301 | -15.072127 |
| H  | 5.840029 | 8.970189 | -15.952202 |
| C  | 4.362730 | 7.578241 | -15.205807 |
| H  | 3.978453 | 7.314009 | -16.190265 |
| C  | 3.808443 | 6.989701 | -14.061521 |
| C  | 2.654818 | 5.996988 | -14.166060 |
| H  | 1.826306 | 6.474695 | -14.707508 |
| H  | 2.960751 | 5.142262 | -14.786281 |
| C  | 1.521539 | 5.958587 | -8.930722  |
| H  | 1.045981 | 6.878956 | -9.253835  |
| C  | 1.026076 | 5.243634 | -7.842433  |
| H  | 0.154499 | 5.616353 | -7.308531  |
| C  | 1.658001 | 4.053039 | -7.463646  |
| H  | 1.286196 | 3.466044 | -6.625715  |
| C  | 2.782684 | 3.635496 | -8.181373  |
| H  | 3.308480 | 2.721630 | -7.909663  |
| C  | 3.243244 | 4.409363 | -9.250991  |
| C  | 4.525606 | 4.100321 | -9.974680  |
| H  | 5.349377 | 4.538794 | -9.394833  |
| H  | 4.712784 | 3.018447 | -10.034718 |
| C  | 3.935149 | 3.826322 | -12.408021 |
| H  | 4.456255 | 4.035498 | -13.348430 |
| H  | 4.125498 | 2.770777 | -12.167124 |
| C  | 2.426707 | 4.058499 | -12.596124 |
| H  | 1.865719 | 3.758195 | -11.705064 |
| H  | 2.075060 | 3.430655 | -13.431897 |
| C  | 6.028990 | 4.918079 | -11.700226 |
| H  | 6.481562 | 5.607819 | -10.982219 |
| H  | 6.118058 | 5.334200 | -12.705577 |
| H  | 6.561715 | 3.956777 | -11.663101 |
| Co | 3.376159 | 6.416952 | -11.278392 |
| N  | 1.982148 | 7.816828 | -11.356058 |
| N  | 4.268946 | 7.293335 | -12.819975 |
| N  | 4.574194 | 4.726865 | -11.349506 |
| N  | 2.612801 | 5.556307 | -9.641830  |
| N  | 2.169493 | 5.510908 | -12.834878 |
| O  | 5.096604 | 7.797163 | -9.225438  |
| H  | 4.681170 | 7.837914 | -8.344142  |
| H  | 5.986913 | 8.169200 | -9.079103  |



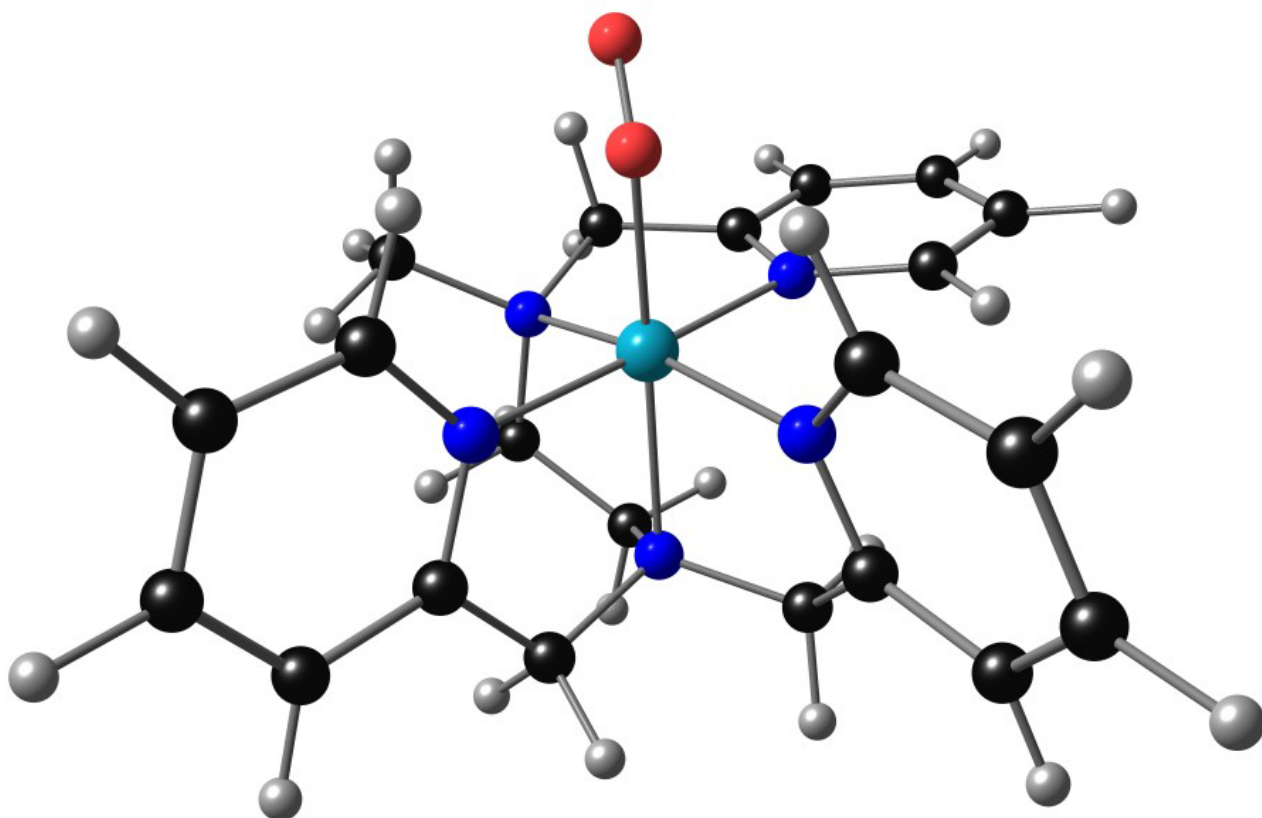

**Figure S16.** The geometry of a minimum of  $[\text{Co}^{\text{III}}(\text{metpen})\text{OO}^*]^{2+}$ . The geometry is optimised at BLYP/TZVP level of theory with the SDD Stuttgart/Dresden effective core potential basis set on Co.

**Table S13** The Cartesian coordinates for the structure of  $[\text{Co}^{\text{III}}(\text{metpen})\text{OO}^*]^{2+}$  optimised at BLYP/TZVP level of theory with the SDD Stuttgart/Dresden effective core potential basis set on Co.  $E = -1384.364869 E_h$ ,  $\langle S^2 \rangle = 0.79$ .

|    |           |           |           |
|----|-----------|-----------|-----------|
| Co | -0.094054 | -0.298763 | 0.481813  |
| O  | -0.488701 | 0.075022  | 2.322372  |
| N  | -1.488721 | 1.046089  | -0.066141 |
| N  | -1.601951 | -1.683958 | 0.081983  |
| N  | 0.628153  | -0.703495 | -1.450636 |
| N  | 1.382115  | 1.042316  | 0.451081  |
| N  | 1.223761  | -1.695627 | 1.027563  |
| C  | 2.890214  | -3.268300 | 0.294854  |
| C  | -1.315902 | 2.389792  | -0.192042 |
| H  | -0.319182 | 2.773988  | -0.005394 |
| C  | -2.358846 | 3.248759  | -0.528512 |
| H  | -2.168603 | 4.316984  | -0.606341 |
| C  | -3.633198 | 2.715827  | -0.756447 |
| H  | -4.466569 | 3.361389  | -1.028287 |

|   |           |           |           |
|---|-----------|-----------|-----------|
| C | -3.819858 | 1.339331  | -0.612563 |
| H | -4.801265 | 0.891215  | -0.758934 |
| C | -2.736572 | 0.531302  | -0.249082 |
| C | -2.910782 | -0.923079 | 0.090658  |
| H | -3.303622 | -0.971139 | 1.113658  |
| H | -3.639094 | -1.416159 | -0.568530 |
| C | -1.750058 | -2.840803 | 1.040207  |
| H | -2.603487 | -3.466765 | 0.742774  |
| H | -1.924992 | -2.450673 | 2.046434  |
| H | -0.844359 | -3.450453 | 1.030962  |
| C | -1.289063 | -2.236391 | -1.305679 |
| H | -2.212994 | -2.584820 | -1.787745 |
| H | -0.653900 | -3.116986 | -1.160735 |
| C | -0.574640 | -1.213430 | -2.191993 |
| H | -0.291734 | -1.679687 | -3.148282 |
| H | -1.220347 | -0.359918 | -2.418686 |
| C | 1.730895  | -1.737630 | -1.373308 |
| H | 2.665641  | -1.287064 | -1.732064 |
| H | 1.510925  | -2.565004 | -2.061877 |
| C | 1.950947  | -2.264360 | 0.030628  |
| C | 1.165175  | 0.610631  | -1.939806 |
| H | 0.317077  | 1.224677  | -2.268792 |
| H | 1.826935  | 0.481324  | -2.808014 |
| C | 1.886516  | 1.298989  | -0.793297 |
| C | 2.960867  | 2.174254  | -0.967177 |
| H | 3.353056  | 2.361067  | -1.965652 |
| C | 3.521313  | 2.804280  | 0.152286  |
| H | 4.358861  | 3.489834  | 0.034160  |
| C | 2.994120  | 2.535989  | 1.420109  |
| H | 3.400623  | 3.004208  | 2.314039  |
| C | 1.925840  | 1.644425  | 1.535726  |
| H | 1.475173  | 1.403586  | 2.496392  |
| O | -1.713877 | 0.015744  | 2.755263  |
| C | 3.098582  | -3.684747 | 1.612264  |
| C | 2.361099  | -3.078851 | 2.637207  |
| C | 1.434451  | -2.091423 | 2.311855  |
| H | 0.838088  | -1.594275 | 3.071903  |
| H | 2.495226  | -3.364625 | 3.678264  |
| H | 3.826003  | -4.463393 | 1.835622  |
| H | 3.454635  | -3.710812 | -0.524770 |

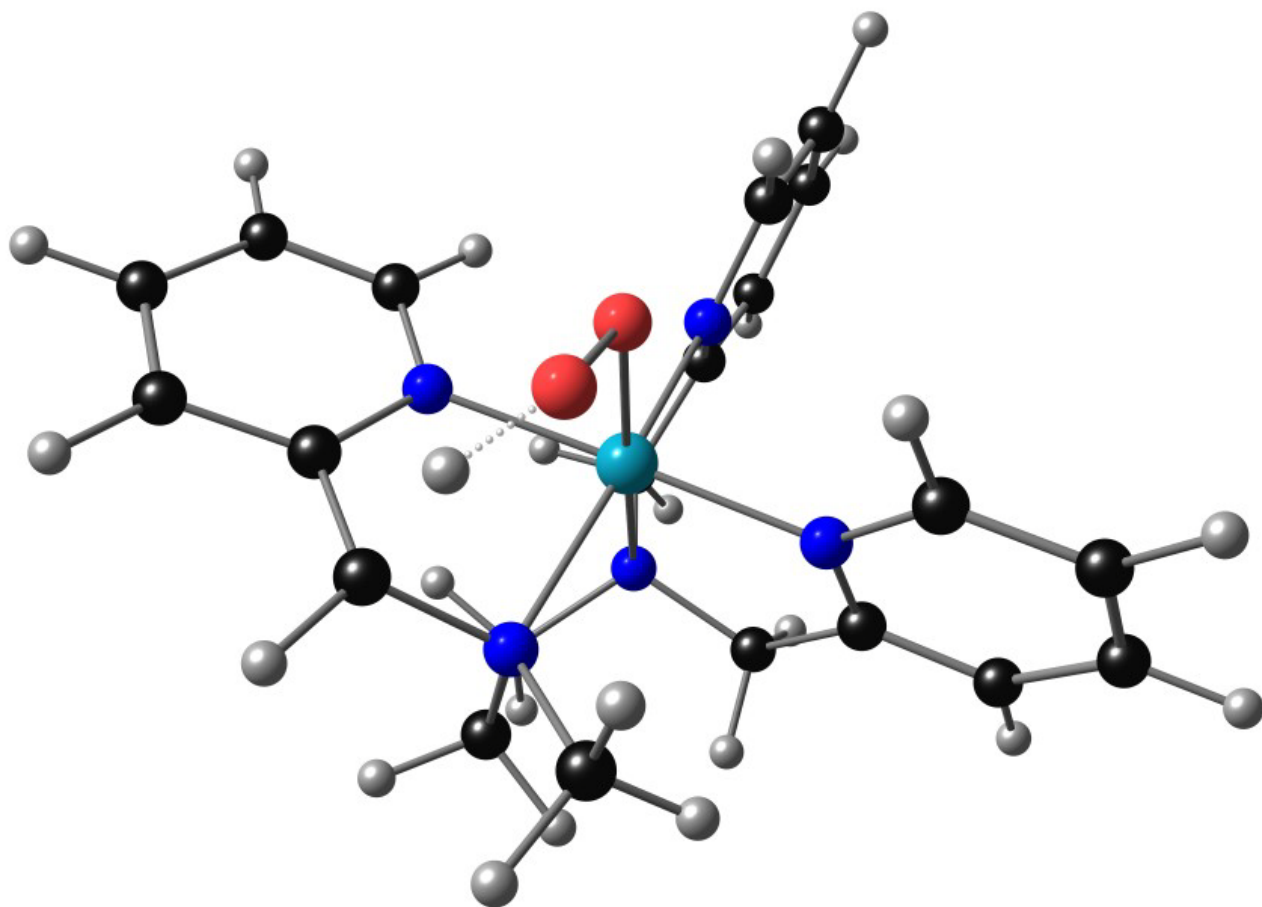

**Figure S17.** The geometry of the transition state of the hydrogen abstraction for metpen. The geometry is optimised at BLYP/TZVP level of theory with the SDD Stuttgart/Dresden effective core potential basis set on Co.

**Table S14** The Cartesian coordinates of the transition state of the hydrogen abstraction for metpen optimised at BLYP/TZVP level of theory with the SDD Stuttgart/Dresden effective core potential basis set on Co.  $G = -1384.323730 E_h$ ,  $\langle S^2 \rangle = 0.76$

|    |           |           |           |
|----|-----------|-----------|-----------|
| Co | -0.078651 | -0.317222 | 0.399668  |
| O  | -0.675757 | 0.200716  | 2.132212  |
| N  | -1.482055 | 1.025439  | -0.202175 |
| N  | -1.596864 | -1.680853 | -0.012982 |
| N  | 0.658575  | -0.739722 | -1.470009 |
| N  | 1.377498  | 1.033709  | 0.446063  |
| N  | 1.203479  | -1.668268 | 1.027659  |
| C  | 2.934158  | -3.207676 | 0.387378  |
| C  | -1.342474 | 2.343479  | -0.471083 |
| H  | -0.328845 | 2.730392  | -0.522173 |
| C  | -2.436773 | 3.186549  | -0.667170 |
| H  | -2.270329 | 4.237488  | -0.892165 |
| C  | -3.734264 | 2.658143  | -0.560030 |

|   |           |           |           |
|---|-----------|-----------|-----------|
| H | -4.604021 | 3.297061  | -0.703007 |
| C | -3.894309 | 1.308436  | -0.264982 |
| H | -4.884285 | 0.868347  | -0.160842 |
| C | -2.751275 | 0.493776  | -0.091773 |
| C | -2.796302 | -0.883962 | 0.317093  |
| H | -2.422902 | -0.700402 | 1.790700  |
| H | -3.746237 | -1.424040 | 0.305918  |
| C | -1.652022 | -2.980486 | 0.760799  |
| H | -2.534130 | -3.555273 | 0.446212  |
| H | -1.717911 | -2.769886 | 1.829920  |
| H | -0.753540 | -3.567831 | 0.558663  |
| C | -1.466452 | -2.032840 | -1.513057 |
| H | -2.463674 | -2.072190 | -1.968664 |
| H | -1.054497 | -3.046397 | -1.552722 |
| C | -0.568297 | -1.061288 | -2.286902 |
| H | -0.295589 | -1.505883 | -3.256570 |
| H | -1.085154 | -0.119755 | -2.484954 |
| C | 1.613274  | -1.916323 | -1.373815 |
| H | 2.532544  | -1.692489 | -1.930393 |
| H | 1.158725  | -2.782285 | -1.872620 |
| C | 1.943327  | -2.275656 | 0.061854  |
| C | 1.367870  | 0.509881  | -1.930989 |
| H | 0.615632  | 1.174923  | -2.375072 |
| H | 2.100851  | 0.284985  | -2.717365 |
| C | 2.012769  | 1.209329  | -0.748697 |
| C | 3.122878  | 2.049858  | -0.856861 |
| H | 3.621324  | 2.173417  | -1.817045 |
| C | 3.576568  | 2.732494  | 0.279836  |
| H | 4.440434  | 3.391960  | 0.214572  |
| C | 2.905792  | 2.556650  | 1.495278  |
| H | 3.223351  | 3.074463  | 2.397801  |
| C | 1.810440  | 1.692433  | 1.547528  |
| H | 1.250882  | 1.516974  | 2.464233  |
| O | -1.700426 | -0.572250 | 2.659946  |
| C | 3.165500  | -3.520253 | 1.730737  |
| C | 2.400274  | -2.886616 | 2.717646  |
| C | 1.431537  | -1.960855 | 2.335208  |
| H | 0.817000  | -1.435203 | 3.060650  |
| H | 2.549806  | -3.098379 | 3.774178  |
| H | 3.932917  | -4.243133 | 2.002388  |
| H | 3.515614  | -3.680625 | -0.402756 |

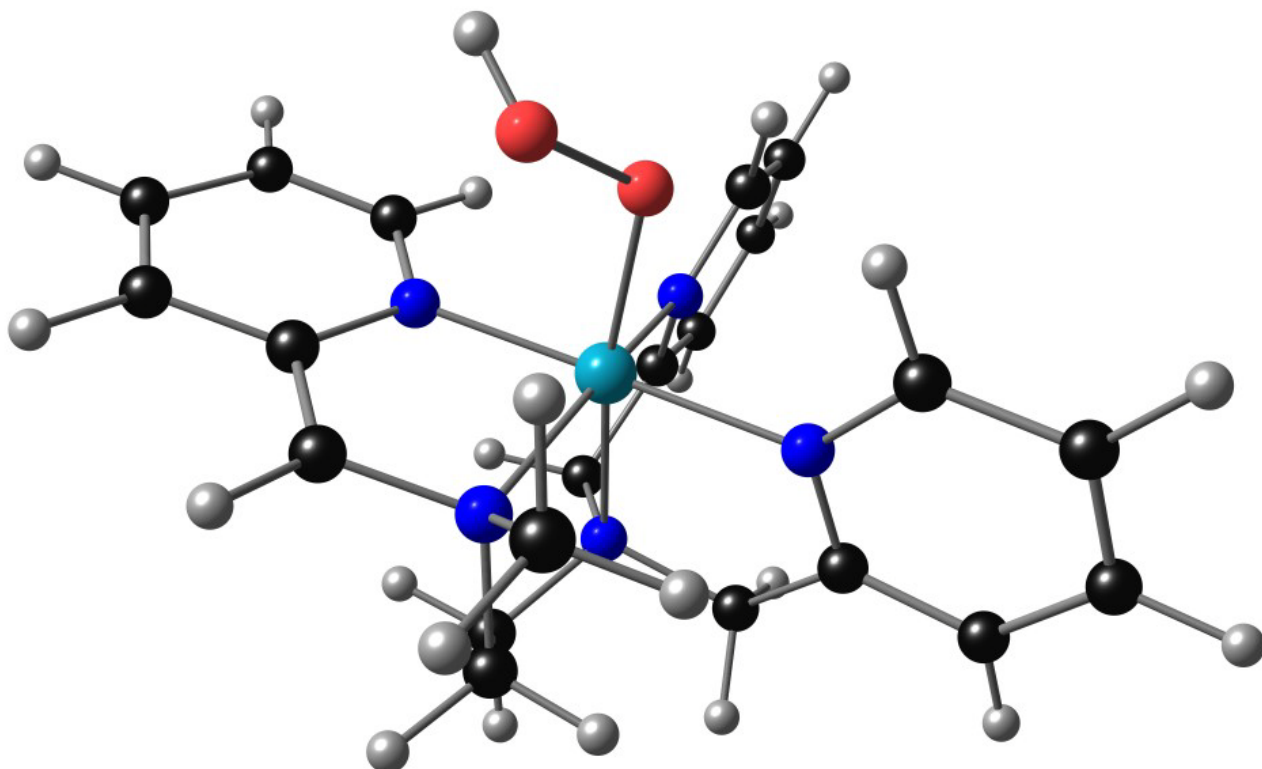

**Figure S18.** The geometry of a minimum of  $[\text{Co}^{\text{III}}(\text{OOH})(\text{metpen-H}^{\bullet})]^{2+}$ . The geometry is optimised at BLYP/TZVP level of theory with the SDD Stuttgart/Dresden effective core potential basis set on Co.

**Table S15** The Cartesian coordinates for the structure of  $[\text{Co}^{\text{III}}(\text{OOH})(\text{metpen-H}^{\bullet})]^{2+}$  optimised at BLYP/TZVP level of theory with the SDD Stuttgart/Dresden effective core potential basis set on Co.  $G = -1384.346585 E_h$ .  $\langle S^2 \rangle = 0.76$ .

|    |           |           |           |
|----|-----------|-----------|-----------|
| Co | -0.066593 | -0.312719 | 0.440484  |
| O  | -0.422129 | 0.034170  | 2.272899  |
| N  | -1.454245 | 1.027015  | -0.073712 |
| N  | -1.582781 | -1.696171 | 0.013492  |
| N  | 0.674042  | -0.725188 | -1.463799 |
| N  | 1.394057  | 1.025954  | 0.412272  |
| N  | 1.229427  | -1.729368 | 1.001719  |
| C  | 2.901288  | -3.307862 | 0.299568  |
| C  | -1.340251 | 2.370271  | -0.083731 |
| H  | -0.352833 | 2.779277  | 0.106549  |
| C  | -2.426069 | 3.225934  | -0.310432 |
| H  | -2.265727 | 4.301663  | -0.305483 |
| C  | -3.702686 | 2.677413  | -0.527484 |
| H  | -4.560450 | 3.323752  | -0.704604 |
| C  | -3.852153 | 1.298421  | -0.501446 |
| H  | -4.824465 | 0.832451  | -0.650386 |

|   |           |           |           |
|---|-----------|-----------|-----------|
| C | -2.717004 | 0.469311  | -0.261901 |
| C | -2.796108 | -0.921238 | -0.168145 |
| H | -2.060964 | 0.782192  | 2.940430  |
| H | -3.740889 | -1.461173 | -0.220619 |
| C | -1.851530 | -2.794271 | 1.021796  |
| H | -2.664993 | -3.438937 | 0.660309  |
| H | -2.134163 | -2.333959 | 1.970069  |
| H | -0.948436 | -3.395523 | 1.147878  |
| C | -1.180065 | -2.331420 | -1.329190 |
| H | -2.068705 | -2.746443 | -1.823958 |
| H | -0.513594 | -3.168757 | -1.094281 |
| C | -0.486986 | -1.305210 | -2.222817 |
| H | -0.158557 | -1.777308 | -3.161071 |
| H | -1.168014 | -0.487886 | -2.482349 |
| C | 1.828778  | -1.706612 | -1.367714 |
| H | 2.755142  | -1.183581 | -1.638378 |
| H | 1.697987  | -2.504145 | -2.111672 |
| C | 1.986385  | -2.286290 | 0.021762  |
| C | 1.160350  | 0.603611  | -1.972922 |
| H | 0.285741  | 1.187183  | -2.286987 |
| H | 1.811480  | 0.489164  | -2.851073 |
| C | 1.877713  | 1.308477  | -0.834632 |
| C | 2.932388  | 2.206809  | -1.008375 |
| H | 3.309645  | 2.416016  | -2.008127 |
| C | 3.494369  | 2.828529  | 0.115457  |
| H | 4.317715  | 3.531263  | -0.001641 |
| C | 2.989682  | 2.528859  | 1.385627  |
| H | 3.401755  | 2.988635  | 2.281382  |
| C | 1.937460  | 1.617741  | 1.501631  |
| H | 1.492337  | 1.350823  | 2.458234  |
| O | -1.811172 | -0.135903 | 2.700487  |
| C | 3.051149  | -3.751433 | 1.617119  |
| C | 2.280009  | -3.157685 | 2.623898  |
| C | 1.376702  | -2.152127 | 2.284303  |
| H | 0.742663  | -1.650534 | 3.011509  |
| H | 2.368715  | -3.467898 | 3.662844  |
| H | 3.759477  | -4.543807 | 1.853374  |
| H | 3.492232  | -3.741978 | -0.505705 |

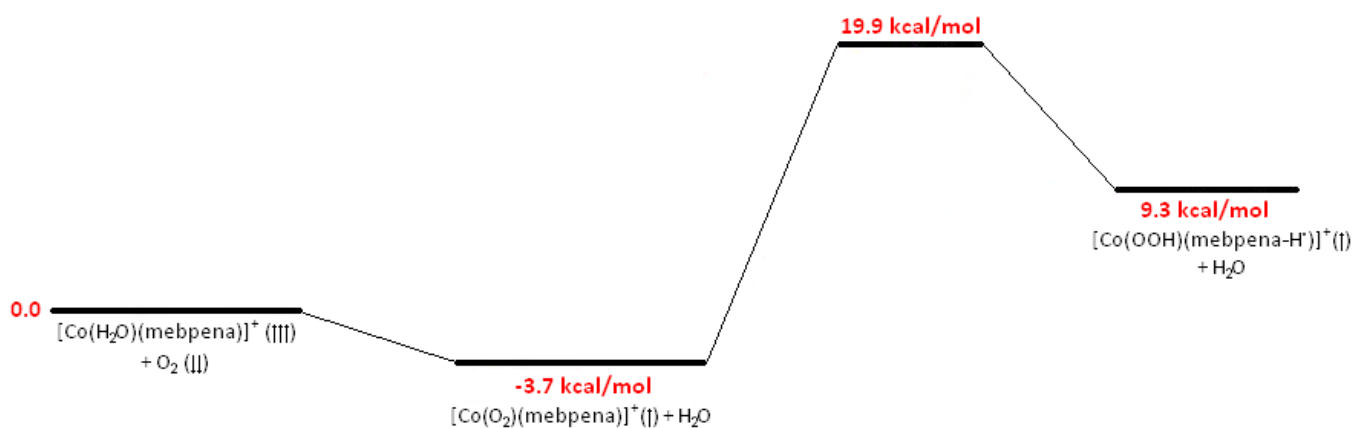

**Figure S19.** Free energy diagram for the first steps in the proposed reaction mechanism of the oxidative *N*-dealkylation of mebpena<sup>-</sup> in the presence of Co(II) and dioxygen.
